# Supplementary material
Source: publisher figshare collection journal article supplement (https://gsajournals.figshare.com/articles/dataset/_/14753628)
Supplement: Supplementary file 1 [file 1]

## Sheet: PAT_BFMI
ensembl_gene_id	chromosome_name	start_position	end_position	mgi_symbol	mgi_description
ENSMUSG00000051951	1	3205901	3671498	Xkr4	X-linked Kx blood group related 4
ENSMUSG00000025900	1	3999557	4409241	Rp1	retinitis pigmentosa 1 (human)
ENSMUSG00000025902	1	4490931	4497354	Sox17	SRY (sex determining region Y)-box 17
ENSMUSG00000033845	1	4773206	4785739	Mrpl15	mitochondrial ribosomal protein L15
ENSMUSG00000025903	1	4807788	4848410	Lypla1	lysophospholipase 1
ENSMUSG00000033813	1	4857814	4897909	Tcea1	transcription elongation factor A (SII) 1
ENSMUSG00000002459	1	4909576	5070285	Rgs20	regulator of G-protein signaling 20
ENSMUSG00000033793	1	5070018	5162529	Atp6v1h	ATPase, H+ transporting, lysosomal V1 subunit H
ENSMUSG00000025905	1	5588466	5606131	Oprk1	opioid receptor, kappa 1
ENSMUSG00000033774	1	5913707	5917398	Npbwr1	neuropeptides B/W receptor 1
ENSMUSG00000025907	1	6206197	6276648	Rb1cc1	RB1-inducible coiled-coil 1
ENSMUSG00000087247	1	6359218	6394731	Alkal1	ALK and LTK ligand 1
ENSMUSG00000033740	1	6487231	6860940	St18	suppression of tumorigenicity 18
ENSMUSG00000051285	1	7088920	7173628	Pcmtd1	protein-L-isoaspartate (D-aspartate) O-methyltransferase domain containing 1
ENSMUSG00000025909	1	8361475	9299878	Sntg1	syntrophin, gamma 1
ENSMUSG00000061024	1	9545408	9547455	Rrs1	ribosome biogenesis regulator 1
ENSMUSG00000025911	1	9547948	9580673	Adhfe1	alcohol dehydrogenase, iron containing, 1
ENSMUSG00000067879	1	9601199	9627143	Vxn	vexin
ENSMUSG00000025912	1	9667415	9700209	Mybl1	myeloblastosis oncogene-like 1
ENSMUSG00000045210	1	9718622	9748382	Vcpip1	valosin containing protein (p97)/p47 complex interacting protein 1
ENSMUSG00000025915	1	9798107	9900845	Sgk3	serum/glucocorticoid regulated kinase 3
ENSMUSG00000046101	1	9908638	9942085	Mcmdc2	minichromosome maintenance domain containing 2
ENSMUSG00000099032	1	9960163	9967932	Tcf24	transcription factor 24
ENSMUSG00000025916	1	9968624	10009136	Ppp1r42	protein phosphatase 1, regulatory subunit 42
ENSMUSG00000025917	1	10024601	10038168	Cops5	COP9 signalosome subunit 5
ENSMUSG00000056763	1	10037987	10136768	Cspp1	centrosome and spindle pole associated protein 1
ENSMUSG00000067851	1	10137571	10232670	Arfgef1	ADP-ribosylation factor guanine nucleotide-exchange factor 1(brefeldin A-inhibited)
ENSMUSG00000042501	1	10324720	10719945	Cpa6	carboxypeptidase A6
ENSMUSG00000048960	1	10993465	11303681	Prex2	phosphatidylinositol-3,4,5-trisphosphate-dependent Rac exchange factor 2
ENSMUSG00000016918	1	12692277	12861192	Sulf1	sulfatase 1
ENSMUSG00000025938	1	12866549	12992650	Slco5a1	solute carrier organic anion transporter family, member 5A1
ENSMUSG00000042414	1	13113457	13127163	Prdm14	PR domain containing 14
ENSMUSG00000005886	1	13139105	13374083	Ncoa2	nuclear receptor coactivator 2
ENSMUSG00000025935	1	13564698	13589910	Tram1	translocating chain-associating membrane protein 1
ENSMUSG00000025937	1	13623330	13660546	Lactb2	lactamase, beta 2
ENSMUSG00000067813	1	13668771	13701723	Xkr9	X-linked Kx blood group related 9
ENSMUSG00000025932	1	14168954	14310235	Eya1	EYA transcriptional coactivator and phosphatase 1
ENSMUSG00000028232	4	3549041	3574853	Tmem68	transmembrane protein 68
ENSMUSG00000028233	4	3574875	3616619	Tgs1	trimethylguanosine synthase 1
ENSMUSG00000042228	4	3678115	3813122	Lyn	LYN proto-oncogene, Src family tyrosine kinase
ENSMUSG00000028234	4	3831334	3835665	Rps20	ribosomal protein S20
ENSMUSG00000078365	4	3870657	3872105	Mos	Moloney sarcoma oncogene
ENSMUSG00000003282	4	3900996	3938423	Plag1	pleiomorphic adenoma gene 1
ENSMUSG00000042198	4	3938888	3951046	Chchd7	coiled-coil-helix-coiled-coil-helix domain containing 7
ENSMUSG00000028236	4	3995936	4019663	Sdr16c5	short chain dehydrogenase/reductase family 16C, member 5
ENSMUSG00000071019	4	4055929	4077522	Sdr16c6	short chain dehydrogenase/reductase family 16C, member 6
ENSMUSG00000045573	4	4133531	4138819	Penk	preproenkephalin
ENSMUSG00000066324	4	4762484	4793355	Impad1	inositol monophosphatase domain containing 1
ENSMUSG00000049119	4	5644090	6108223	Fam110b	family with sequence similarity 110, member B
ENSMUSG00000028243	4	6191098	6221688	Ubxn2b	UBX domain protein 2B
ENSMUSG00000028240	4	6265612	6275633	Cyp7a1	cytochrome P450, family 7, subfamily a, polypeptide 1
ENSMUSG00000028249	4	6365650	6408423	Sdcbp	syndecan binding protein
ENSMUSG00000028245	4	6396207	6454271	Nsmaf	neutral sphingomyelinase (N-SMase) activation associated factor
ENSMUSG00000041272	4	6686353	6991557	Tox	thymocyte selection-associated high mobility group box
ENSMUSG00000041261	4	8143362	8239041	Car8	carbonic anhydrase 8
ENSMUSG00000047187	4	8535644	8607778	Rab2a	RAB2A, member RAS oncogene family
ENSMUSG00000041235	4	8690406	8867659	Chd7	chromodomain helicase DNA binding protein 7
ENSMUSG00000041216	4	9269293	9451691	Clvs1	clavesin 1
ENSMUSG00000028207	4	9448069	9669344	Asph	aspartate-beta-hydroxylase
ENSMUSG00000051279	4	9844372	9862345	Gdf6	growth differentiation factor 6
ENSMUSG00000049969	4	10988662	11007927	Plekhf2	pleckstrin homology domain containing, family F (with FYVE domain) member 2
ENSMUSG00000050323	4	11051045	11076205	Ndufaf6	NADH:ubiquinone oxidoreductase complex assembly factor 6
ENSMUSG00000028211	4	11156431	11174379	Trp53inp1	transformation related protein 53 inducible nuclear protein 1
ENSMUSG00000028212	4	11191351	11204779	Ccne2	cyclin E2
ENSMUSG00000040738	4	11199158	11254258	Ints8	integrator complex subunit 8
ENSMUSG00000045205	4	11261315	11322137	Dpy19l4	dpy-19-like 4 (C. elegans)
ENSMUSG00000040728	4	11331933	11386783	Esrp1	epithelial splicing regulatory protein 1
ENSMUSG00000040720	4	11485958	11550684	Virma	vir like m6A methyltransferase associated
ENSMUSG00000078773	4	11558922	11615805	Rad54b	RAD54 homolog B (S. cerevisiae)
ENSMUSG00000094595	4	11579665	11587591	Fsbp	fibrinogen silencer binding protein
ENSMUSG00000028214	4	11704457	11714752	Gem	GTP binding protein (gene overexpressed in skeletal muscle)
ENSMUSG00000028217	4	11758147	11817895	Cdh17	cadherin 17
ENSMUSG00000049225	4	11958184	11966452	Pdp1	pyruvate dehyrogenase phosphatase catalytic subunit 1
ENSMUSG00000049488	4	12039355	12090020	Tmem67	transmembrane protein 67
ENSMUSG00000052137	4	12089439	12096243	Rbm12b2	RNA binding motif protein 12 B2
ENSMUSG00000046667	4	12140264	12146731	Rbm12b1	RNA binding motif protein 12 B1
ENSMUSG00000028218	4	12153409	12172015	Fam92a	family with sequence similarity 92, member A
ENSMUSG00000028226	4	17852893	18119145	Mmp16	matrix metallopeptidase 16
ENSMUSG00000073991	4	18860454	19122526	Cnbd1	cyclic nucleotide binding domain containing 1
ENSMUSG00000056494	4	19280850	19510623	Cngb3	cyclic nucleotide gated channel beta 3
ENSMUSG00000028228	4	19519254	19570108	Cpne3	copine III
ENSMUSG00000028229	4	19575162	19606932	Rmdn1	regulator of microtubule dynamics 1
ENSMUSG00000041058	4	19608303	19708993	Wwp1	WW domain containing E3 ubiquitin protein ligase 1
ENSMUSG00000041052	4	19818725	19842218	Slc7a13	solute carrier family 7, (cationic amino acid transporter, y+ system) member 13
ENSMUSG00000028238	4	19876841	19922605	Atp6v0d2	ATPase, H+ transporting, lysosomal V0 subunit D2
ENSMUSG00000073988	4	20007938	20030785	Ttpa	tocopherol (alpha) transfer protein
ENSMUSG00000073987	4	20042052	20066750	Ggh	gamma-glutamyl hydrolase
ENSMUSG00000055761	4	20118874	20778866	Nkain3	Na+/K+ transporting ATPase interacting 3
ENSMUSG00000044288	4	33924593	33948831	Cnr1	cannabinoid receptor 1 (brain)
ENSMUSG00000028264	4	34024874	34050191	Spaca1	sperm acrosome associated 1
ENSMUSG00000028291	4	34550937	34566908	Akirin2	akirin 2
ENSMUSG00000040044	4	34570796	34614944	Orc3	origin recognition complex, subunit 3
ENSMUSG00000028292	4	34614957	34660167	Rars2	arginyl-tRNA synthetase 2, mitochondrial
ENSMUSG00000028293	4	34663257	34687438	Slc35a1	solute carrier family 35 (CMP-sialic acid transporter), member 1
ENSMUSG00000028294	4	34688559	34730206	Cfap206	cilia and flagella associated protein 206
ENSMUSG00000028295	4	34768664	34778423	Smim8	small integral membrane protein 8
ENSMUSG00000039967	4	34803113	34882960	Zfp292	zinc finger protein 292
ENSMUSG00000028298	4	34893779	34907370	Cga	glycoprotein hormones, alpha subunit
ENSMUSG00000073910	4	34949074	35157484	Mob3b	MOB kinase activator 3B
ENSMUSG00000090053	4	57434247	57712016	Pakap	paralemmin A kinase anchor protein
ENSMUSG00000089945	4	57568179	57896982	Pakap	paralemmin A kinase anchor protein
ENSMUSG00000038729	4	57717657	57896984	Pakap	paralemmin A kinase anchor protein
ENSMUSG00000028367	4	57943373	57956411	Txn1	thioredoxin 1
ENSMUSG00000038709	4	57984027	58009124	Txndc8	thioredoxin domain containing 8
ENSMUSG00000028369	4	58042442	58206859	Svep1	sushi, von Willebrand factor type A, EGF and pentraxin domain containing 1
ENSMUSG00000028399	4	75941238	78211961	Ptprd	protein tyrosine phosphatase, receptor type, D
ENSMUSG00000005994	4	80834123	80851719	Tyrp1	tyrosinase-related protein 1
ENSMUSG00000048706	4	80910646	80955628	Lurap1l	leucine rich adaptor protein 1-like
ENSMUSG00000001985	4	125490700	125714173	Grik3	glutamate receptor, ionotropic, kainate 3
ENSMUSG00000028859	4	126024550	126044440	Csf3r	colony stimulating factor 3 receptor (granulocyte)
ENSMUSG00000028861	4	126046925	126055532	Mrps15	mitochondrial ribosomal protein S15
ENSMUSG00000042616	4	126058565	126092195	Oscp1	organic solute carrier partner 1
ENSMUSG00000050188	4	126096623	126098584	Lsm10	U7 snRNP-specific Sm-like protein LSM10
ENSMUSG00000042608	4	126103957	126141029	Stk40	serine/threonine kinase 40
ENSMUSG00000050212	4	126147744	126149875	Eva1b	eva-1 homolog B (C. elegans)
ENSMUSG00000073758	4	126150602	126163491	Sh3d21	SH3 domain containing 21
ENSMUSG00000043962	4	126164082	126202760	Thrap3	thyroid hormone receptor associated protein 3
ENSMUSG00000028849	4	126232167	126256343	Map7d1	MAP7 domain containing 1
ENSMUSG00000028847	4	126262325	126275883	Trappc3	trafficking protein particle complex 3
ENSMUSG00000056174	4	126286793	126314330	Col8a2	collagen, type VIII, alpha 2
ENSMUSG00000042558	4	126316047	126321703	Adprhl2	ADP-ribosylhydrolase like 2
ENSMUSG00000028845	4	126322121	126325688	Tekt2	tektin 2
ENSMUSG00000028842	4	126331704	126429556	Ago3	argonaute RISC catalytic subunit 3
ENSMUSG00000041530	4	126435012	126468583	Ago1	argonaute RISC catalytic subunit 1
ENSMUSG00000042500	4	126489541	126533472	Ago4	argonaute RISC catalytic subunit 4
ENSMUSG00000042489	4	126556935	126593903	Clspn	claspin
ENSMUSG00000028837	4	126677630	126709714	Psmb2	proteasome (prosome, macropain) subunit, beta type 2
ENSMUSG00000042477	4	126716006	126736240	Tfap2e	transcription factor AP-2, epsilon
ENSMUSG00000028833	4	126743750	126753438	Ncdn	neurochondrin
ENSMUSG00000028830	4	126753544	126870070	AU040320	expressed sequence AU040320
ENSMUSG00000042446	4	126861939	126968135	Zmym4	zinc finger, MYM-type 4
ENSMUSG00000028820	4	127021324	127037013	Sfpq	splicing factor proline/glutamine rich (polypyrimidine tract binding protein associated)
ENSMUSG00000043872	4	127047094	127061152	Zmym1	zinc finger, MYM domain containing 1
ENSMUSG00000042408	4	127077383	127124372	Zmym6	zinc finger, MYM-type 6
ENSMUSG00000070737	4	127123691	127129644	Tmem35b	transmembrane protein 35B
ENSMUSG00000042388	4	127169204	127237022	Dlgap3	DLG associated protein 3
ENSMUSG00000042380	4	127243784	127247809	Smim12	small integral membrane protein 12
ENSMUSG00000050234	4	127311421	127314039	Gja4	gap junction protein, alpha 4
ENSMUSG00000042367	4	127325235	127330844	Gjb3	gap junction protein, beta 3
ENSMUSG00000046623	4	127351086	127354081	Gjb4	gap junction protein, beta 4
ENSMUSG00000042357	4	127354809	127358181	Gjb5	gap junction protein, beta 5
ENSMUSG00000028813	4	127927592	127970951	CK137956	cDNA sequence CK137956
ENSMUSG00000028804	4	127987857	128567656	Csmd2	CUB and Sushi multiple domains 2
ENSMUSG00000048686	4	128260212	128260957	Hmgb4	high-mobility group box 4
ENSMUSG00000061894	4	128583539	128610098	Zscan20	zinc finger and SCAN domains 20
ENSMUSG00000062545	4	128615443	128618619	Tlr12	toll-like receptor 12
ENSMUSG00000028796	4	128654702	128752881	Phc2	polyhomeotic 2
ENSMUSG00000028794	4	128755364	128769298	A3galt2	alpha 1,3-galactosyltransferase 2 (isoglobotriaosylceramide synthase)
ENSMUSG00000028799	4	128773088	128806045	Zfp362	zinc finger protein 362
ENSMUSG00000041000	4	128883580	128911328	Trim62	tripartite motif-containing 62
ENSMUSG00000028789	4	128930233	128962442	Azin2	antizyme inhibitor 2
ENSMUSG00000028792	4	128991958	129011529	Ak2	adenylate kinase 2
ENSMUSG00000028793	4	129058271	129085886	Rnf19b	ring finger protein 19B
ENSMUSG00000028786	4	129105548	129111626	Tmem54	transmembrane protein 54
ENSMUSG00000028785	4	129111570	129122036	Hpca	hippocalcin
ENSMUSG00000001334	4	129136999	129144593	Fndc5	fibronectin type III domain containing 5
ENSMUSG00000040928	4	129148005	129189727	S100pbp	S100P binding protein
ENSMUSG00000028811	4	129189760	129219607	Yars	tyrosyl-tRNA synthetase
ENSMUSG00000050390	4	129219578	129261404	C77080	expressed sequence C77080
ENSMUSG00000001333	4	129287617	129308559	Sync	syncoilin
ENSMUSG00000057236	4	129307100	129335370	Rbbp4	retinoblastoma binding protein 4, chromatin remodeling factor
ENSMUSG00000057572	4	129335695	129354547	Zbtb8os	zinc finger and BTB domain containing 8 opposite strand
ENSMUSG00000028807	4	129353628	129378116	Zbtb8a	zinc finger and BTB domain containing 8a
ENSMUSG00000048485	4	129425765	129440853	Zbtb8b	zinc finger and BTB domain containing 8b
ENSMUSG00000060402	7	34674468	34812711	Chst8	carbohydrate sulfotransferase 8
ENSMUSG00000060487	10	9622936	9675208	Samd5	sterile alpha motif domain containing 5
ENSMUSG00000019790	10	9755547	9901079	Stxbp5	syntaxin binding protein 5 (tomosyn)
ENSMUSG00000050994	10	10335703	10472326	Adgb	androglobin
ENSMUSG00000019832	10	10545002	10558265	Rab32	RAB32, member RAS oncogene family
ENSMUSG00000019828	10	10686059	11082356	Grm1	glutamate receptor, metabotropic 1
ENSMUSG00000090112	10	11149427	11217595	Shprh	SNF2 histone linker PHD RING helicase
ENSMUSG00000047648	10	11281330	11298052	Fbxo30	F-box protein 30
ENSMUSG00000055493	10	11343404	11459644	Epm2a	epilepsy, progressive myoclonic epilepsy, type 2 gene alpha
ENSMUSG00000019820	10	12382188	12869365	Utrn	utrophin
ENSMUSG00000020627	12	5077472	5375682	Klhl29	kelch-like 29
ENSMUSG00000020609	12	7977648	8016835	Apob	apolipoprotein B
ENSMUSG00000037669	12	8208107	8285759	Ldah	lipid droplet associated hydrolase
ENSMUSG00000037660	12	8297918	8301954	Gdf7	growth differentiation factor 7
ENSMUSG00000020605	12	8313432	8343824	Hs1bp3	HCLS1 binding protein 3
ENSMUSG00000054364	12	8497661	8500009	Rhob	ras homolog family member B
ENSMUSG00000020600	12	8528483	8599066	Slc7a15	solute carrier family 7 (cationic amino acid transporter, y+ system), member 15
ENSMUSG00000020594	12	8674134	8752581	Pum2	pumilio RNA-binding family member 2
ENSMUSG00000020592	12	8771323	8793715	Sdc1	syndecan 1
ENSMUSG00000020585	12	8921664	8938742	Laptm4a	lysosomal-associated protein transmembrane 4A
ENSMUSG00000020583	12	8947929	8972028	Matn3	matrilin 3
ENSMUSG00000066643	12	8973892	9028847	Wdr35	WD repeat domain 35
ENSMUSG00000066637	12	9029997	9041988	Ttc32	tetratricopeptide repeat domain 32
ENSMUSG00000048387	12	9570116	9581500	Osr1	odd-skipped related transcription factor 1
ENSMUSG00000020622	12	10369973	10390175	Nt5c1b	5'-nucleotidase, cytosolic IB
ENSMUSG00000020621	12	10390772	10395562	Rdh14	retinol dehydrogenase 14 (all-trans and 9-cis)
ENSMUSG00000043673	12	11090202	11151056	Kcns3	potassium voltage-gated channel, delayed-rectifier, subfamily S, member 3
ENSMUSG00000047002	12	11208360	11208972	Msgn1	mesogenin 1
ENSMUSG00000051235	12	11238920	11265801	Gen1	GEN1, Holliday junction 5' flap endonuclease
ENSMUSG00000020608	12	11265886	11319785	Smc6	structural maintenance of chromosomes 6
ENSMUSG00000054459	12	11325242	11436613	Vsnl1	visinin-like 1
ENSMUSG00000086022	12	11456079	11462928	Rad51ap2	RAD51 associated protein 2
ENSMUSG00000047446	12	40005447	40038025	Arl4a	ADP-ribosylation factor-like 4A
ENSMUSG00000002565	12	40059769	40134228	Scin	scinderin
ENSMUSG00000071342	12	40175493	40199490	Lsmem1	leucine-rich single-pass membrane protein 1
ENSMUSG00000001627	12	40201567	40248504	Ifrd1	interferon-related developmental regulator 1
ENSMUSG00000055917	12	40315046	40445902	Zfp277	zinc finger protein 277
ENSMUSG00000035954	12	40445952	40846874	Dock4	dedicator of cytokinesis 4
ENSMUSG00000056899	12	41024090	41955588	Immp2l	IMP2 inner mitochondrial membrane peptidase-like (S. cerevisiae)
ENSMUSG00000036295	12	41451668	41486431	Lrrn3	leucine rich repeat protein 3, neuronal
ENSMUSG00000014905	12	44205559	44210326	Dnajb9	DnaJ heat shock protein family (Hsp40) member B9
ENSMUSG00000036257	12	44221370	44322532	Pnpla8	patatin-like phospholipase domain containing 8
ENSMUSG00000020598	12	44328885	44601964	Nrcam	neuronal cell adhesion molecule
ENSMUSG00000046314	12	44852484	45074709	Stxbp6	syntaxin binding protein 6 (amisyn)
ENSMUSG00000021423	13	37345208	37419036	Ly86	lymphocyte antigen 86
ENSMUSG00000033960	18	4634878	4682869	Jcad	junctional cadherin 5 associated
ENSMUSG00000024236	18	4920540	5119299	Svil	supervillin
ENSMUSG00000050945	18	5210029	5334807	Zfp438	zinc finger protein 438
ENSMUSG00000024238	18	5591860	5775467	Zeb1	zinc finger E-box binding homeobox 1
ENSMUSG00000041225	18	6024427	6136098	Arhgap12	Rho GTPase activating protein 12
ENSMUSG00000006740	18	6201002	6242174	Kif5b	kinesin family member 5B
ENSMUSG00000024240	18	6435951	6516108	Epc1	enhancer of polycomb homolog 1
ENSMUSG00000073639	18	6733905	6794429	Rab18	RAB18, member RAS oncogene family
ENSMUSG00000061013	18	6934518	7004780	Mkx	mohawk homeobox
ENSMUSG00000061802	18	7088209	7297936	Armc4	armadillo repeat containing 4
ENSMUSG00000057440	18	7347959	7626866	Mpp7	membrane protein, palmitoylated 7 (MAGUK p55 subfamily member 7)
ENSMUSG00000024283	18	7868832	7929028	Wac	WW domain containing adaptor with coiled-coil
ENSMUSG00000036904	18	9212163	9218136	Fzd8	frizzled class receptor 8
ENSMUSG00000036855	18	9278607	9282809	Gjd4	gap junction protein, delta 4
ENSMUSG00000024286	18	9312304	9450154	Ccny	cyclin Y
ENSMUSG00000050996	18	9615524	9619478	Cetn1	centrin 1
ENSMUSG00000036103	18	9707595	9882644	Colec12	collectin sub-family member 12
ENSMUSG00000024287	18	9957906	9995489	Thoc1	THO complex 1
ENSMUSG00000047879	18	9993066	10045119	Usp14	ubiquitin specific peptidase 14
ENSMUSG00000024290	18	10064401	10182045	Rock1	Rho-associated coiled-coil containing protein kinase 1
ENSMUSG00000042942	18	10325177	10562940	Greb1l	growth regulation by estrogen in breast cancer-like
ENSMUSG00000024293	18	10566507	10610352	Esco1	establishment of sister chromatid cohesion N-acetyltransferase 1
ENSMUSG00000002477	18	10617775	10642079	Snrpd1	small nuclear ribonucleoprotein D1
ENSMUSG00000002475	18	10642092	10706771	Abhd3	abhydrolase domain containing 3
ENSMUSG00000024294	18	10725548	10818704	Mib1	mindbomb E3 ubiquitin protein ligase 1
ENSMUSG00000005836	18	11052064	11085635	Gata6	GATA binding protein 6
ENSMUSG00000041238	18	11633276	11745221	Rbbp8	retinoblastoma binding protein 8, endonuclease
ENSMUSG00000040957	18	11839220	11945630	Cables1	CDK5 and Abl enzyme substrate 1
ENSMUSG00000049411	18	11964450	12121537	Tmem241	transmembrane protein 241
ENSMUSG00000024404	18	12128741	12157387	Riok3	RIO kinase 3
ENSMUSG00000024410	18	12168717	12190658	Rmc1	regulator of MON1-CCZ1
ENSMUSG00000024413	18	12189692	12236400	Npc1	NPC intracellular cholesterol transporter 1
ENSMUSG00000057766	18	12252362	12305797	Ankrd29	ankyrin repeat domain 29
ENSMUSG00000024421	18	12333819	12583013	Lama3	laminin, alpha 3
ENSMUSG00000024424	18	12599896	12738863	Ttc39c	tetratricopeptide repeat domain 39C
ENSMUSG00000024430	18	12740322	12755260	Cabyr	calcium-binding tyrosine-(Y)-phosphorylation regulated (fibrousheathin 2)
ENSMUSG00000044252	18	12755314	12941841	Osbpl1a	oxysterol binding protein-like 1A
ENSMUSG00000024423	18	12955852	12992950	Impact	impact, RWD domain protein
ENSMUSG00000037346	18	13006990	13022882	Hrh4	histamine receptor H4
ENSMUSG00000024420	18	13687013	13972787	Zfp521	zinc finger protein 521
ENSMUSG00000024440	18	38267089	38284402	Pcdh12	protocadherin 12
ENSMUSG00000060450	18	38284537	38317849	Rnf14	ring finger protein 14
ENSMUSG00000052102	18	38327535	38339003	Gnpda1	glucosamine-6-phosphate deaminase 1
ENSMUSG00000024425	18	38410396	38465303	Ndfip1	Nedd4 family interacting protein 1
ENSMUSG00000024427	18	38586247	38601415	Spry4	sprouty RTK signaling antagonist 4
ENSMUSG00000118193	18	38676718	39110534	Arhgap26	Rho GTPase activating protein 26
ENSMUSG00000036585	18	38838673	38929472	Fgf1	fibroblast growth factor 1
ENSMUSG00000036452	18	38993145	39376284	Arhgap26	Rho GTPase activating protein 26
ENSMUSG00000024431	18	39410545	39519421	Nr3c1	nuclear receptor subfamily 3, group C, member 1
ENSMUSG00000051732	18	39773497	39776082	Pabpc2	poly(A) binding protein, cytoplasmic 2
ENSMUSG00000024487	18	40203896	40219429	Yipf5	Yip1 domain family, member 5
ENSMUSG00000051401	18	40256962	40531630	Kctd16	potassium channel tetramerisation domain containing 16
ENSMUSG00000056671	18	41875600	41951242	Prelid2	PRELI domain containing 2
ENSMUSG00000073574	18	41985323	41999049	Grxcr2	glutaredoxin, cysteine rich 2
ENSMUSG00000057719	18	42053667	42158960	Sh3rf2	SH3 domain containing ring finger 2
ENSMUSG00000059455	18	42178683	42196709	Plac8l1	PLAC8-like 1
ENSMUSG00000024493	18	42202298	42262194	Lars	leucyl-tRNA synthetase
ENSMUSG00000024491	18	42275353	42341542	Rbm27	RNA binding motif protein 27
ENSMUSG00000024497	18	42394539	42397249	Pou4f3	POU domain, class 4, transcription factor 3
ENSMUSG00000024498	18	42511487	42575793	Tcerg1	transcription elongation regulator 1 (CA150)
ENSMUSG00000042816	18	42577881	42579652	Gpr151	G protein-coupled receptor 151
ENSMUSG00000024500	18	42637432	43083127	Ppp2r2b	protein phosphatase 2, regulatory subunit B, beta
ENSMUSG00000058152	18	59175401	59535999	Chsy3	chondroitin sulfate synthase 3
ENSMUSG00000054072	18	60376027	60392634	Iigp1	interferon inducible GTPase 1
ENSMUSG00000038059	18	60474191	60501987	Smim3	small integral membrane protein 3
ENSMUSG00000024603	18	60526185	60558766	Dctn4	dynactin 4
ENSMUSG00000024604	18	60560736	60572810	Rbm22	RNA binding motif protein 22
ENSMUSG00000049173	18	60573750	60591788	Myoz3	myozenin 3
ENSMUSG00000043079	18	60593973	60660142	Synpo	synaptopodin
ENSMUSG00000054008	18	60684494	60748650	Ndst1	N-deacetylase/N-sulfotransferase (heparan glucosaminyl) 1
ENSMUSG00000024608	18	60747098	60778546	Rps14	ribosomal protein S14
ENSMUSG00000024610	18	60803848	60812652	Cd74	CD74 antigen (invariant polypeptide of major histocompatibility complex, class II antigen-associated)
ENSMUSG00000024613	18	60813755	60848971	Tcof1	treacle ribosome biogenesis factor 1
ENSMUSG00000036412	18	60911780	60918561	Arsi	arylsulfatase i
ENSMUSG00000024617	18	60925618	60988152	Camk2a	calcium/calmodulin-dependent protein kinase II alpha
ENSMUSG00000052026	18	60995380	61014222	Slc6a7	solute carrier family 6 (neurotransmitter transporter, L-proline), member 7
ENSMUSG00000024619	18	61018862	61036199	Cdx1	caudal type homeobox 1
ENSMUSG00000024620	18	61045150	61085061	Pdgfrb	platelet derived growth factor receptor, beta polypeptide
ENSMUSG00000024621	18	61100598	61132149	Csf1r	colony stimulating factor 1 receptor
ENSMUSG00000024622	18	61131277	61177050	Hmgxb3	HMG box domain containing 3
ENSMUSG00000024589	18	64887705	65217828	Nedd4l	neural precursor cell expressed, developmentally down-regulated gene 4-like
ENSMUSG00000032845	18	65265529	65394066	Alpk2	alpha-kinase 2
ENSMUSG00000060534	18	71253634	72351069	Dcc	deleted in colorectal carcinoma

## Sheet: PAT_BFMI_SNP
ensembl_gene_id	chromosome_name	start_position	end_position	mgi_symbol	mgi_description
ENSMUSG00000025907	1	6206197	6276648	Rb1cc1	RB1-inducible coiled-coil 1
ENSMUSG00000033740	1	6487231	6860940	St18	suppression of tumorigenicity 18
ENSMUSG00000045210	1	9718622	9748382	Vcpip1	valosin containing protein (p97)/p47 complex interacting protein 1
ENSMUSG00000046101	1	9908638	9942085	Mcmdc2	minichromosome maintenance domain containing 2
ENSMUSG00000048960	1	10993465	11303681	Prex2	phosphatidylinositol-3,4,5-trisphosphate-dependent Rac exchange factor 2
ENSMUSG00000028207	4	9448069	9669344	Asph	aspartate-beta-hydroxylase
ENSMUSG00000040044	4	34570796	34614944	Orc3	origin recognition complex, subunit 3
ENSMUSG00000089945	4	57568179	57896982	Pakap	paralemmin A kinase anchor protein
ENSMUSG00000038729	4	57717657	57896984	Pakap	paralemmin A kinase anchor protein
ENSMUSG00000005994	4	80834123	80851719	Tyrp1	tyrosinase-related protein 1
ENSMUSG00000001333	4	129287617	129308559	Sync	syncoilin
ENSMUSG00000028807	4	129353628	129378116	Zbtb8a	zinc finger and BTB domain containing 8a
ENSMUSG00000060402	7	34674468	34812711	Chst8	carbohydrate sulfotransferase 8
ENSMUSG00000090112	10	11149427	11217595	Shprh	SNF2 histone linker PHD RING helicase
ENSMUSG00000020609	12	7977648	8016835	Apob	apolipoprotein B
ENSMUSG00000020605	12	8313432	8343824	Hs1bp3	HCLS1 binding protein 3
ENSMUSG00000020583	12	8947929	8972028	Matn3	matrilin 3
ENSMUSG00000086022	12	11456079	11462928	Rad51ap2	RAD51 associated protein 2
ENSMUSG00000024238	18	5591860	5775467	Zeb1	zinc finger E-box binding homeobox 1
ENSMUSG00000006740	18	6201002	6242174	Kif5b	kinesin family member 5B
ENSMUSG00000024240	18	6435951	6516108	Epc1	enhancer of polycomb homolog 1
ENSMUSG00000024293	18	10566507	10610352	Esco1	establishment of sister chromatid cohesion N-acetyltransferase 1
ENSMUSG00000049411	18	11964450	12121537	Tmem241	transmembrane protein 241
ENSMUSG00000024413	18	12189692	12236400	Npc1	NPC intracellular cholesterol transporter 1
ENSMUSG00000024421	18	12333819	12583013	Lama3	laminin, alpha 3
ENSMUSG00000024440	18	38267089	38284402	Pcdh12	protocadherin 12
ENSMUSG00000058152	18	59175401	59535999	Chsy3	chondroitin sulfate synthase 3
ENSMUSG00000032845	18	65265529	65394066	Alpk2	alpha-kinase 2

## Sheet: MAT_BFMI
ensembl_gene_id	chromosome_name	start_position	end_position	mgi_symbol	mgi_description
ENSMUSG00000051951	1	3205901	3671498	Xkr4	X-linked Kx blood group related 4
ENSMUSG00000025900	1	3999557	4409241	Rp1	retinitis pigmentosa 1 (human)
ENSMUSG00000025902	1	4490931	4497354	Sox17	SRY (sex determining region Y)-box 17
ENSMUSG00000033845	1	4773206	4785739	Mrpl15	mitochondrial ribosomal protein L15
ENSMUSG00000025903	1	4807788	4848410	Lypla1	lysophospholipase 1
ENSMUSG00000033813	1	4857814	4897909	Tcea1	transcription elongation factor A (SII) 1
ENSMUSG00000002459	1	4909576	5070285	Rgs20	regulator of G-protein signaling 20
ENSMUSG00000033793	1	5070018	5162529	Atp6v1h	ATPase, H+ transporting, lysosomal V1 subunit H
ENSMUSG00000025905	1	5588466	5606131	Oprk1	opioid receptor, kappa 1
ENSMUSG00000033774	1	5913707	5917398	Npbwr1	neuropeptides B/W receptor 1
ENSMUSG00000025907	1	6206197	6276648	Rb1cc1	RB1-inducible coiled-coil 1
ENSMUSG00000087247	1	6359218	6394731	Alkal1	ALK and LTK ligand 1
ENSMUSG00000033740	1	6487231	6860940	St18	suppression of tumorigenicity 18
ENSMUSG00000051285	1	7088920	7173628	Pcmtd1	protein-L-isoaspartate (D-aspartate) O-methyltransferase domain containing 1
ENSMUSG00000025909	1	8361475	9299878	Sntg1	syntrophin, gamma 1
ENSMUSG00000061024	1	9545408	9547455	Rrs1	ribosome biogenesis regulator 1
ENSMUSG00000025911	1	9547948	9580673	Adhfe1	alcohol dehydrogenase, iron containing, 1
ENSMUSG00000067879	1	9601199	9627143	Vxn	vexin
ENSMUSG00000025912	1	9667415	9700209	Mybl1	myeloblastosis oncogene-like 1
ENSMUSG00000045210	1	9718622	9748382	Vcpip1	valosin containing protein (p97)/p47 complex interacting protein 1
ENSMUSG00000025915	1	9798107	9900845	Sgk3	serum/glucocorticoid regulated kinase 3
ENSMUSG00000046101	1	9908638	9942085	Mcmdc2	minichromosome maintenance domain containing 2
ENSMUSG00000099032	1	9960163	9967932	Tcf24	transcription factor 24
ENSMUSG00000025916	1	9968624	10009136	Ppp1r42	protein phosphatase 1, regulatory subunit 42
ENSMUSG00000025917	1	10024601	10038168	Cops5	COP9 signalosome subunit 5
ENSMUSG00000056763	1	10037987	10136768	Cspp1	centrosome and spindle pole associated protein 1
ENSMUSG00000067851	1	10137571	10232670	Arfgef1	ADP-ribosylation factor guanine nucleotide-exchange factor 1(brefeldin A-inhibited)
ENSMUSG00000042501	1	10324720	10719945	Cpa6	carboxypeptidase A6
ENSMUSG00000048960	1	10993465	11303681	Prex2	phosphatidylinositol-3,4,5-trisphosphate-dependent Rac exchange factor 2
ENSMUSG00000016918	1	12692277	12861192	Sulf1	sulfatase 1
ENSMUSG00000025938	1	12866549	12992650	Slco5a1	solute carrier organic anion transporter family, member 5A1
ENSMUSG00000042414	1	13113457	13127163	Prdm14	PR domain containing 14
ENSMUSG00000005886	1	13139105	13374083	Ncoa2	nuclear receptor coactivator 2
ENSMUSG00000025935	1	13564698	13589910	Tram1	translocating chain-associating membrane protein 1
ENSMUSG00000025937	1	13623330	13660546	Lactb2	lactamase, beta 2
ENSMUSG00000067813	1	13668771	13701723	Xkr9	X-linked Kx blood group related 9
ENSMUSG00000025932	1	14168954	14310235	Eya1	EYA transcriptional coactivator and phosphatase 1
ENSMUSG00000025930	1	14753346	14755992	Msc	musculin
ENSMUSG00000032769	1	14872648	14918862	Trpa1	transient receptor potential cation channel, subfamily A, member 1
ENSMUSG00000092083	1	15287254	15723750	Kcnb2	potassium voltage gated channel, Shab-related subfamily, member 2
ENSMUSG00000025925	1	15805646	15844052	Terf1	telomeric repeat binding factor 1
ENSMUSG00000032719	1	15853862	15892722	Sbspon	somatomedin B and thrombospondin, type 1 domain containing
ENSMUSG00000043716	1	16101295	16104662	Rpl7	ribosomal protein L7
ENSMUSG00000025921	1	16105774	16133734	Rdh10	retinol dehydrogenase 10 (all-trans)
ENSMUSG00000025920	1	16228674	16520112	Stau2	staufen double-stranded RNA binding protein 2
ENSMUSG00000025939	1	16540790	16619489	Ube2w	ubiquitin-conjugating enzyme E2W (putative)
ENSMUSG00000079658	1	16641725	16657042	Eloc	elongin C
ENSMUSG00000025940	1	16665207	16678275	Tmem70	transmembrane protein 70
ENSMUSG00000025779	1	16688051	16709611	Ly96	lymphocyte antigen 96
ENSMUSG00000042686	1	16964560	17097889	Jph1	junctophilin 1
ENSMUSG00000025777	1	17145362	17164271	Gdap1	ganglioside-induced differentiation-associated-protein 1
ENSMUSG00000067780	1	17601901	17630939	Pi15	peptidase inhibitor 15
ENSMUSG00000025776	1	17727045	17766344	Crispld1	cysteine-rich secretory protein LCCL domain containing 1
ENSMUSG00000025774	1	18115191	18145902	Crisp4	cysteine-rich secretory protein 4
ENSMUSG00000073735	1	18236473	18237443	Defb18	defensin beta 18
ENSMUSG00000067773	1	18250980	18265138	Defb41	defensin beta 41
ENSMUSG00000042596	1	19103022	19166346	Tfap2d	transcription factor AP-2, delta
ENSMUSG00000025927	1	19208914	19238576	Tfap2b	transcription factor AP-2 beta
ENSMUSG00000043760	1	20057779	20618064	Pkhd1	polycystic kidney and hepatic disease 1
ENSMUSG00000025929	1	20730905	20734496	Il17a	interleukin 17A
ENSMUSG00000041872	1	20777146	20790617	Il17f	interleukin 17F
ENSMUSG00000041859	1	20802968	20820312	Mcm3	minichromosome maintenance complex component 3
ENSMUSG00000025931	1	20890606	20939650	Paqr8	progestin and adipoQ receptor family member VIII
ENSMUSG00000041809	1	20951626	20990841	Efhc1	EF-hand domain (C-terminal) containing 1
ENSMUSG00000041779	1	20996299	21079229	Tram2	translocating chain-associating membrane protein 2
ENSMUSG00000027908	3	93468754	93471980	Tchhl1	trichohyalin-like 1
ENSMUSG00000027907	3	93520488	93526287	S100a11	S100 calcium binding protein A11
ENSMUSG00000041959	3	93555080	93564643	S100a10	S100 calcium binding protein A10 (calpactin)
ENSMUSG00000103362	3	93651542	93652686	Tdpoz2	TD and POZ domain containing 2
ENSMUSG00000094084	3	93669333	93676310	Tdpoz1	TD and POZ domain containing 1
ENSMUSG00000103350	3	93692050	93693070	Tdpoz6	TD and POZ domain containing 6
ENSMUSG00000060256	3	93796398	93797510	Tdpoz4	TD and POZ domain containing 4
ENSMUSG00000058005	3	93826020	93827117	Tdpoz3	TD and POZ domain containing 3
ENSMUSG00000094163	3	93960292	93961314	Tdpoz5	TD and POZ domain containing 5
ENSMUSG00000094328	3	94047981	94054885	Tdpoz9	TD and POZ domain containing 9
ENSMUSG00000095251	3	94071622	94072644	Tdpoz7	Td and POZ domain containing 7
ENSMUSG00000074424	3	94174412	94178193	Spopfm2	speckle-type BTB/POZ protein family member 2
ENSMUSG00000090268	3	94196714	94199802	Spopfm3	speckle-type BTB/POZ protein family member 3
ENSMUSG00000089696	3	94264036	94266784	Spopfm1	speckle-type BTB/POZ protein family member 1
ENSMUSG00000028145	3	94310089	94332540	Them4	thioesterase superfamily member 4
ENSMUSG00000028148	3	94342099	94347352	Them5	thioesterase superfamily member 5
ENSMUSG00000091648	3	94362438	94364566	C2cd4d	C2 calcium-dependent domain containing 4D
ENSMUSG00000028150	3	94372794	94398276	Rorc	RAR-related orphan receptor gamma
ENSMUSG00000044505	3	94398517	94404501	Lingo4	leucine rich repeat and Ig domain containing 4
ENSMUSG00000041912	3	94413273	94434668	Tdrkh	tudor and KH domain containing protein
ENSMUSG00000028141	3	94432414	94443915	Oaz3	ornithine decarboxylase antizyme 3
ENSMUSG00000028140	3	94443318	94451130	Mrpl9	mitochondrial ribosomal protein L9
ENSMUSG00000028139	3	94464983	94480341	Riiad1	regulatory subunit of type II PKA R-subunit (RIIa) domain containing 1
ENSMUSG00000028137	3	94478295	94492198	Celf3	CUGBP, Elav-like family member 3
ENSMUSG00000028136	3	94497544	94582716	Snx27	sorting nexin family member 27
ENSMUSG00000005968	3	94612757	94658872	Tuft1	tuftelin 1
ENSMUSG00000068877	3	94693556	94704413	Selenbp2	selenium binding protein 2
ENSMUSG00000068876	3	94760069	94786515	Cgn	cingulin
ENSMUSG00000028232	4	3549041	3574853	Tmem68	transmembrane protein 68
ENSMUSG00000028233	4	3574875	3616619	Tgs1	trimethylguanosine synthase 1
ENSMUSG00000042228	4	3678115	3813122	Lyn	LYN proto-oncogene, Src family tyrosine kinase
ENSMUSG00000028234	4	3831334	3835665	Rps20	ribosomal protein S20
ENSMUSG00000078365	4	3870657	3872105	Mos	Moloney sarcoma oncogene
ENSMUSG00000003282	4	3900996	3938423	Plag1	pleiomorphic adenoma gene 1
ENSMUSG00000042198	4	3938888	3951046	Chchd7	coiled-coil-helix-coiled-coil-helix domain containing 7
ENSMUSG00000028236	4	3995936	4019663	Sdr16c5	short chain dehydrogenase/reductase family 16C, member 5
ENSMUSG00000071019	4	4055929	4077522	Sdr16c6	short chain dehydrogenase/reductase family 16C, member 6
ENSMUSG00000045573	4	4133531	4138819	Penk	preproenkephalin
ENSMUSG00000066324	4	4762484	4793355	Impad1	inositol monophosphatase domain containing 1
ENSMUSG00000049119	4	5644090	6108223	Fam110b	family with sequence similarity 110, member B
ENSMUSG00000028243	4	6191098	6221688	Ubxn2b	UBX domain protein 2B
ENSMUSG00000028240	4	6265612	6275633	Cyp7a1	cytochrome P450, family 7, subfamily a, polypeptide 1
ENSMUSG00000028249	4	6365650	6408423	Sdcbp	syndecan binding protein
ENSMUSG00000028245	4	6396207	6454271	Nsmaf	neutral sphingomyelinase (N-SMase) activation associated factor
ENSMUSG00000041272	4	6686353	6991557	Tox	thymocyte selection-associated high mobility group box
ENSMUSG00000041261	4	8143362	8239041	Car8	carbonic anhydrase 8
ENSMUSG00000047187	4	8535644	8607778	Rab2a	RAB2A, member RAS oncogene family
ENSMUSG00000041235	4	8690406	8867659	Chd7	chromodomain helicase DNA binding protein 7
ENSMUSG00000041216	4	9269293	9451691	Clvs1	clavesin 1
ENSMUSG00000028207	4	9448069	9669344	Asph	aspartate-beta-hydroxylase
ENSMUSG00000051279	4	9844372	9862345	Gdf6	growth differentiation factor 6
ENSMUSG00000049969	4	10988662	11007927	Plekhf2	pleckstrin homology domain containing, family F (with FYVE domain) member 2
ENSMUSG00000050323	4	11051045	11076205	Ndufaf6	NADH:ubiquinone oxidoreductase complex assembly factor 6
ENSMUSG00000028211	4	11156431	11174379	Trp53inp1	transformation related protein 53 inducible nuclear protein 1
ENSMUSG00000028212	4	11191351	11204779	Ccne2	cyclin E2
ENSMUSG00000040738	4	11199158	11254258	Ints8	integrator complex subunit 8
ENSMUSG00000045205	4	11261315	11322137	Dpy19l4	dpy-19-like 4 (C. elegans)
ENSMUSG00000040728	4	11331933	11386783	Esrp1	epithelial splicing regulatory protein 1
ENSMUSG00000040720	4	11485958	11550684	Virma	vir like m6A methyltransferase associated
ENSMUSG00000078773	4	11558922	11615805	Rad54b	RAD54 homolog B (S. cerevisiae)
ENSMUSG00000094595	4	11579665	11587591	Fsbp	fibrinogen silencer binding protein
ENSMUSG00000028214	4	11704457	11714752	Gem	GTP binding protein (gene overexpressed in skeletal muscle)
ENSMUSG00000028217	4	11758147	11817895	Cdh17	cadherin 17
ENSMUSG00000049225	4	11958184	11966452	Pdp1	pyruvate dehyrogenase phosphatase catalytic subunit 1
ENSMUSG00000049488	4	12039355	12090020	Tmem67	transmembrane protein 67
ENSMUSG00000052137	4	12089439	12096243	Rbm12b2	RNA binding motif protein 12 B2
ENSMUSG00000046667	4	12140264	12146731	Rbm12b1	RNA binding motif protein 12 B1
ENSMUSG00000028218	4	12153409	12172015	Fam92a	family with sequence similarity 92, member A
ENSMUSG00000028399	4	75941238	78211961	Ptprd	protein tyrosine phosphatase, receptor type, D
ENSMUSG00000029121	5	37241940	37292133	Crmp1	collapsin response mediator protein 1
ENSMUSG00000029122	5	37289098	37336894	Evc	EvC ciliary complex subunit 1
ENSMUSG00000050248	5	37338499	37425055	Evc2	EvC ciliary complex subunit 2
ENSMUSG00000029123	5	37446825	37717171	Stk32b	serine/threonine kinase 32B
ENSMUSG00000062329	5	37735519	37739820	Cytl1	cytokine-like 1
ENSMUSG00000048450	5	37820485	37824583	Msx1	msh homeobox 1
ENSMUSG00000029125	5	38038742	38137765	Stx18	syntaxin 18
ENSMUSG00000029126	5	38137192	38159907	Nsg1	neuron specific gene family member 1
ENSMUSG00000029127	5	38189735	38220457	Zbtb49	zinc finger and BTB domain containing 49
ENSMUSG00000067367	5	38220470	38234306	Lyar	Ly1 antibody reactive clone
ENSMUSG00000067365	5	38260185	38269634	Tmem128	transmembrane protein 128
ENSMUSG00000051596	5	38275972	38304217	Otop1	otopetrin 1
ENSMUSG00000039358	5	38319367	38322518	Drd5	dopamine receptor D5
ENSMUSG00000005107	5	38349273	38503143	Slc2a9	solute carrier family 2 (facilitated glucose transporter), member 9
ENSMUSG00000005103	5	38526813	38563221	Wdr1	WD repeat domain 1
ENSMUSG00000046572	5	38668484	38684826	Zfp518b	zinc finger protein 518B
ENSMUSG00000039315	5	38706462	38876812	Clnk	cytokine-dependent hematopoietic cell linker
ENSMUSG00000047735	6	3372257	3399572	Samd9l	sterile alpha motif domain containing 9-like
ENSMUSG00000044156	6	3457096	3498298	Hepacam2	HEPACAM family member 2
ENSMUSG00000001376	6	3498382	3603531	Vps50	VPS50 EARP/GARPII complex subunit
ENSMUSG00000023964	6	3685680	3764714	Calcr	calcitonin receptor
ENSMUSG00000029664	6	3962595	3988919	Tfpi2	tissue factor pathway inhibitor 2
ENSMUSG00000029663	6	3993792	3997436	Gngt1	guanine nucleotide binding protein (G protein), gamma transducing activity polypeptide 1
ENSMUSG00000032766	6	4003904	4008445	Gng11	guanine nucleotide binding protein (G protein), gamma 11
ENSMUSG00000032757	6	4076899	4086972	Bet1	Bet1 golgi vesicular membrane trafficking protein
ENSMUSG00000029661	6	4504814	4541544	Col1a2	collagen, type I, alpha 2
ENSMUSG00000015189	6	4600839	4643355	Casd1	CAS1 domain containing 1
ENSMUSG00000004631	6	4674350	4747207	Sgce	sarcoglycan, epsilon
ENSMUSG00000092035	6	4747306	4760517	Peg10	paternally expressed 10
ENSMUSG00000032827	6	4902917	5165661	Ppp1r9a	protein phosphatase 1, regulatory subunit 9A
ENSMUSG00000002588	6	5168090	5193946	Pon1	paraoxonase 1
ENSMUSG00000029759	6	5220852	5256286	Pon3	paraoxonase 3
ENSMUSG00000029553	6	16833373	16898441	Tfec	transcription factor EC
ENSMUSG00000029552	6	17065149	17105828	Tes	testis derived transcript
ENSMUSG00000000058	6	17281185	17289115	Cav2	caveolin 2
ENSMUSG00000007655	6	17306335	17341452	Cav1	caveolin 1, caveolae protein
ENSMUSG00000009376	6	17463800	17573980	Met	met proto-oncogene
ENSMUSG00000015733	6	17636234	17666972	Capza2	capping protein (actin filament) muscle Z-line, alpha 2
ENSMUSG00000029534	6	17692933	17943025	St7	suppression of tumorigenicity 7
ENSMUSG00000010797	6	17988940	18030585	Wnt2	wingless-type MMTV integration site family, member 2
ENSMUSG00000010796	6	18050964	18109061	Asz1	ankyrin repeat, SAM and basic leucine zipper domain containing 1
ENSMUSG00000041301	6	18170687	18322768	Cftr	cystic fibrosis transmembrane conductance regulator
ENSMUSG00000000416	6	18366478	18514843	Cttnbp2	cortactin binding protein 2
ENSMUSG00000044155	6	18848579	18855751	Lsm8	LSM8 homolog, U6 small nuclear RNA associated
ENSMUSG00000029517	6	18866318	18879586	Ankrd7	ankyrin repeat domain 7
ENSMUSG00000060882	6	21215503	21729805	Kcnd2	potassium voltage-gated channel, Shal-related family, member 2
ENSMUSG00000029669	6	21771395	21852515	Tspan12	tetraspanin 12
ENSMUSG00000029670	6	21949571	21976038	Ing3	inhibitor of growth family, member 3
ENSMUSG00000062980	6	21985916	22256404	Cped1	cadherin-like and PC-esterase domain containing 1
ENSMUSG00000029671	6	22288227	22298522	Wnt16	wingless-type MMTV integration site family, member 16
ENSMUSG00000029672	6	22306520	22356243	Fam3c	family with sequence similarity 3, member C
ENSMUSG00000068748	6	22875502	23052916	Ptprz1	protein tyrosine phosphatase, receptor type Z, polypeptide 1
ENSMUSG00000029695	6	23072173	23132986	Aass	aminoadipate-semialdehyde synthase
ENSMUSG00000029697	6	23245044	23248362	Fezf1	Fez family zinc finger 1
ENSMUSG00000017978	6	23262773	23839421	Cadps2	Ca2+-dependent activator protein for secretion 2
ENSMUSG00000051956	6	23648869	23650305	Rnf133	ring finger protein 133
ENSMUSG00000078179	6	23653898	23655136	Rnf148	ring finger protein 148
ENSMUSG00000043865	6	23969161	23970060	Tas2r118	taste receptor, type 2, member 118
ENSMUSG00000029700	6	24088283	24168092	Slc13a1	solute carrier family 13 (sodium/sulfate symporters), member 1
ENSMUSG00000046192	6	24444865	24515067	Iqub	IQ motif and ubiquitin domain containing
ENSMUSG00000023089	6	24518666	24528013	Ndufa5	NADH:ubiquinone oxidoreductase subunit A5
ENSMUSG00000029685	6	24528144	24573164	Asb15	ankyrin repeat and SOCS box-containing 15
ENSMUSG00000029683	6	24597762	24605414	Lmod2	leiomodin 2 (cardiac)
ENSMUSG00000029684	6	24613805	24665009	Wasl	Wiskott-Aldrich syndrome-like (human)
ENSMUSG00000029679	6	24733245	24745452	Hyal6	hyaluronoglucosaminidase 6
ENSMUSG00000029680	6	24748329	24767662	Hyal4	hyaluronoglucosaminidase 4
ENSMUSG00000029682	6	24791188	24801048	Spam1	sperm adhesion molecule 1
ENSMUSG00000029678	6	24857997	24891958	Hyal5	hyaluronoglucosaminidase 5
ENSMUSG00000048022	6	24951141	24956297	Tmem229a	transmembrane protein 229A
ENSMUSG00000039904	6	25665878	25690729	Gpr37	G protein-coupled receptor 37
ENSMUSG00000029676	6	25743737	25809246	Pot1a	protection of telomeres 1A
ENSMUSG00000019820	10	12382188	12869365	Utrn	utrophin
ENSMUSG00000039232	10	12938209	12964298	Stx11	syntaxin 11
ENSMUSG00000078348	10	13005343	13009183	Sf3b5	splicing factor 3b, subunit 5
ENSMUSG00000019817	10	13060504	13131694	Plagl1	pleiomorphic adenoma gene-like 1
ENSMUSG00000019815	10	13149540	13178023	Zc2hc1b	zinc finger, C2HC-type containing 1B
ENSMUSG00000019814	10	13178140	13193168	Ltv1	LTV1 ribosome biogenesis factor
ENSMUSG00000062866	10	13207717	13474412	Phactr2	phosphatase and actin regulator 2
ENSMUSG00000019810	10	13499540	13519035	Fuca2	fucosidase, alpha-L- 2, plasma
ENSMUSG00000019809	10	13523842	13553142	Pex3	peroxisomal biogenesis factor 3
ENSMUSG00000019808	10	13552894	13563376	Adat2	adenosine deaminase, tRNA-specific 2
ENSMUSG00000019806	10	13647054	13868980	Aig1	androgen-induced 1
ENSMUSG00000015501	10	13966075	14151374	Hivep2	human immunodeficiency virus type I enhancer binding protein 2
ENSMUSG00000039116	10	14402583	14545659	Adgrg6	adhesion G protein-coupled receptor G6
ENSMUSG00000019868	10	14654755	14705560	Vta1	vesicle (multivesicular body) trafficking 1
ENSMUSG00000019865	10	14705591	14770850	Nmbr	neuromedin B receptor
ENSMUSG00000019867	10	14715623	14718214	Gje1	gap junction protein, epsilon 1
ENSMUSG00000020627	12	5077472	5375682	Klhl29	kelch-like 29
ENSMUSG00000020609	12	7977648	8016835	Apob	apolipoprotein B
ENSMUSG00000037669	12	8208107	8285759	Ldah	lipid droplet associated hydrolase
ENSMUSG00000037660	12	8297918	8301954	Gdf7	growth differentiation factor 7
ENSMUSG00000020605	12	8313432	8343824	Hs1bp3	HCLS1 binding protein 3
ENSMUSG00000054364	12	8497661	8500009	Rhob	ras homolog family member B
ENSMUSG00000020600	12	8528483	8599066	Slc7a15	solute carrier family 7 (cationic amino acid transporter, y+ system), member 15
ENSMUSG00000020594	12	8674134	8752581	Pum2	pumilio RNA-binding family member 2
ENSMUSG00000020592	12	8771323	8793715	Sdc1	syndecan 1
ENSMUSG00000020585	12	8921664	8938742	Laptm4a	lysosomal-associated protein transmembrane 4A
ENSMUSG00000020583	12	8947929	8972028	Matn3	matrilin 3
ENSMUSG00000066643	12	8973892	9028847	Wdr35	WD repeat domain 35
ENSMUSG00000066637	12	9029997	9041988	Ttc32	tetratricopeptide repeat domain 32
ENSMUSG00000048387	12	9570116	9581500	Osr1	odd-skipped related transcription factor 1
ENSMUSG00000008859	13	17880571	17944239	Rala	v-ral simian leukemia viral oncogene A (ras related)
ENSMUSG00000075054	13	17981330	17993349	Yae1d1	Yae1 domain containing 1
ENSMUSG00000009734	13	18121098	18397686	Pou6f2	POU domain, class 6, transcription factor 2
ENSMUSG00000041236	13	18717286	18866811	Vps41	VPS41 HOPS complex subunit
ENSMUSG00000021314	13	18948205	19150921	Amph	amphiphysin
ENSMUSG00000003062	13	19357676	19395795	Stard3nl	STARD3 N-terminal like
ENSMUSG00000002808	13	19591706	19619927	Epdr1	ependymin related protein 1 (zebrafish)
ENSMUSG00000021319	13	19623104	19632994	Sfrp4	secreted frizzled-related protein 4
ENSMUSG00000041138	13	19645078	19697794	Nme8	NME/NM23 family member 8
ENSMUSG00000047462	13	19727426	19732951	Gpr141b	G protein-coupled receptor 141B
ENSMUSG00000053101	13	19749682	19824257	Gpr141	G protein-coupled receptor 141
ENSMUSG00000041112	13	20090596	20608353	Elmo1	engulfment and cell motility 1
ENSMUSG00000021322	13	20794113	21036617	Aoah	acyloxyacyl hydrolase
ENSMUSG00000042869	13	21069334	21074947	Olfr1370	olfactory receptor 1370
ENSMUSG00000060404	13	21111483	21119095	Olfr1369-ps1	olfactory receptor 1369, pseudogene 1
ENSMUSG00000071522	13	21129639	21136296	Olfr263	olfactory receptor 263
ENSMUSG00000045474	13	21141882	21145867	Olfr1368	olfactory receptor 1368
ENSMUSG00000021326	13	21179445	21194724	Trim27	tripartite motif-containing 27
ENSMUSG00000004344	13	21286429	21292731	Gpx5	glutathione peroxidase 5
ENSMUSG00000004341	13	21312125	21319624	Gpx6	glutathione peroxidase 6
ENSMUSG00000045508	13	21346910	21347964	Olfr1367	olfactory receptor 1367
ENSMUSG00000036721	13	21362820	21372289	Zscan12	zinc finger and SCAN domain containing 12
ENSMUSG00000021327	13	21387003	21402755	Zkscan3	zinc finger with KRAB and SCAN domains 3
ENSMUSG00000055313	13	21421275	21441058	Pgbd1	piggyBac transposable element derived 1
ENSMUSG00000022228	13	21442180	21453730	Zscan26	zinc finger and SCAN domain containing 26
ENSMUSG00000059395	13	21467047	21468509	Nkapl	NFKB activating protein-like
ENSMUSG00000054931	13	21478907	21485507	Zkscan4	zinc finger with KRAB and SCAN domains 4
ENSMUSG00000078139	13	21495223	21497146	AK157302	cDNA sequence AK157302
ENSMUSG00000079941	13	21501029	21501418	Cox5b-ps	cytochrome c oxidase subunit 5B, pseudogene
ENSMUSG00000063894	13	21513222	21531120	Zkscan8	zinc finger with KRAB and SCAN domains 8
ENSMUSG00000048996	13	21535113	21542808	Olfr1366	olfactory receptor 1366
ENSMUSG00000054890	13	21553894	21559893	Olfr1535	olfactory receptor 1535
ENSMUSG00000046016	13	21571813	21581759	Olfr1364	olfactory receptor 1364
ENSMUSG00000051258	13	21610978	21614022	Olfr1362	olfactory receptor 1362
ENSMUSG00000036658	13	21636623	21642518	Olfr11	olfactory receptor 11
ENSMUSG00000049737	13	21656880	21663386	Olfr1361	olfactory receptor 1361
ENSMUSG00000108534	13	21673431	21677405	Olfr1360	olfactory receptor 1360
ENSMUSG00000108674	13	21698111	21706833	Olfr1359	olfactory receptor 1359
ENSMUSG00000094338	13	21715763	21716143	H2bc13	H2B clustered histone 13
ENSMUSG00000071516	13	21716422	21716814	H2ac13	H2A clustered histone 13
ENSMUSG00000101355	13	21717659	21718069	H3c10	H3 clustered histone 10
ENSMUSG00000114279	13	21722044	21722567	H2bc14	H2B clustered histone 14
ENSMUSG00000067455	13	21735064	21735837	H4c11	H4 clustered histone 11
ENSMUSG00000064288	13	21750194	21750505	H4c12	H4 clustered histone 12
ENSMUSG00000063021	13	21753435	21753827	H2ac15	H2A clustered histone 15
ENSMUSG00000095217	13	21754123	21754503	H2bc15	H2B clustered histone 15
ENSMUSG00000058773	13	21779883	21780625	H1f5	H1.5 linker histone, cluster member
ENSMUSG00000101972	13	21782960	21783370	H3c11	H3 clustered histone 11
ENSMUSG00000069309	13	21786826	21787218	Hist1h2an	histone cluster 1, H2an
ENSMUSG00000069308	13	21787461	21789213	Hist1h2bp	histone cluster 1, H2bp
ENSMUSG00000069307	13	21806612	21810197	Hist1h2bq	histone cluster 1, H2bq
ENSMUSG00000094248	13	21810465	21810944	Hist1h2ao	histone cluster 1, H2ao
ENSMUSG00000069306	13	21811746	21812147	Hist1h4m	histone cluster 1, H4m
ENSMUSG00000069305	13	21831767	21832196	Hist1h4n	histone cluster 1, H4n
ENSMUSG00000094777	13	21833026	21833507	Hist1h2ap	histone cluster 1, H2ap
ENSMUSG00000069303	13	21833743	21837530	Hist1h2br	histone cluster 1 H2br
ENSMUSG00000006720	13	21945094	21960779	Zfp184	zinc finger protein 184 (Kruppel-like)
ENSMUSG00000016982	13	21981194	21988734	Pom121l2	POM121 membrane glycoprotein-like 2 (rat)
ENSMUSG00000006179	13	22002173	22009742	Prss16	protease, serine 16 (thymus)
ENSMUSG00000069302	13	22035164	22035568	H2ac12	H2A clustered histone 12
ENSMUSG00000062727	13	22035870	22036345	H2bc12	H2B clustered histone 12
ENSMUSG00000060639	13	22040636	22041362	H4c9	H4 clustered histone 9
ENSMUSG00000069301	13	22042460	22042944	H2ac11	H2A clustered histone 11
ENSMUSG00000069300	13	22043214	22043676	H2bc11	H2B clustered histone 11
ENSMUSG00000069299	13	22084440	22095916	Vmn1r188	vomeronasal 1 receptor 188
ENSMUSG00000033960	18	4634878	4682869	Jcad	junctional cadherin 5 associated
ENSMUSG00000024236	18	4920540	5119299	Svil	supervillin
ENSMUSG00000050945	18	5210029	5334807	Zfp438	zinc finger protein 438
ENSMUSG00000024238	18	5591860	5775467	Zeb1	zinc finger E-box binding homeobox 1
ENSMUSG00000041225	18	6024427	6136098	Arhgap12	Rho GTPase activating protein 12
ENSMUSG00000006740	18	6201002	6242174	Kif5b	kinesin family member 5B
ENSMUSG00000024240	18	6435951	6516108	Epc1	enhancer of polycomb homolog 1
ENSMUSG00000073639	18	6733905	6794429	Rab18	RAB18, member RAS oncogene family
ENSMUSG00000061013	18	6934518	7004780	Mkx	mohawk homeobox
ENSMUSG00000061802	18	7088209	7297936	Armc4	armadillo repeat containing 4
ENSMUSG00000057440	18	7347959	7626866	Mpp7	membrane protein, palmitoylated 7 (MAGUK p55 subfamily member 7)
ENSMUSG00000024283	18	7868832	7929028	Wac	WW domain containing adaptor with coiled-coil
ENSMUSG00000036904	18	9212163	9218136	Fzd8	frizzled class receptor 8
ENSMUSG00000036855	18	9278607	9282809	Gjd4	gap junction protein, delta 4
ENSMUSG00000024286	18	9312304	9450154	Ccny	cyclin Y
ENSMUSG00000050996	18	9615524	9619478	Cetn1	centrin 1
ENSMUSG00000036103	18	9707595	9882644	Colec12	collectin sub-family member 12
ENSMUSG00000024287	18	9957906	9995489	Thoc1	THO complex 1
ENSMUSG00000047879	18	9993066	10045119	Usp14	ubiquitin specific peptidase 14
ENSMUSG00000024290	18	10064401	10182045	Rock1	Rho-associated coiled-coil containing protein kinase 1
ENSMUSG00000042942	18	10325177	10562940	Greb1l	growth regulation by estrogen in breast cancer-like
ENSMUSG00000024293	18	10566507	10610352	Esco1	establishment of sister chromatid cohesion N-acetyltransferase 1
ENSMUSG00000002477	18	10617775	10642079	Snrpd1	small nuclear ribonucleoprotein D1
ENSMUSG00000002475	18	10642092	10706771	Abhd3	abhydrolase domain containing 3
ENSMUSG00000024294	18	10725548	10818704	Mib1	mindbomb E3 ubiquitin protein ligase 1
ENSMUSG00000005836	18	11052064	11085635	Gata6	GATA binding protein 6
ENSMUSG00000041238	18	11633276	11745221	Rbbp8	retinoblastoma binding protein 8, endonuclease
ENSMUSG00000040957	18	11839220	11945630	Cables1	CDK5 and Abl enzyme substrate 1
ENSMUSG00000049411	18	11964450	12121537	Tmem241	transmembrane protein 241
ENSMUSG00000024404	18	12128741	12157387	Riok3	RIO kinase 3
ENSMUSG00000024410	18	12168717	12190658	Rmc1	regulator of MON1-CCZ1
ENSMUSG00000024413	18	12189692	12236400	Npc1	NPC intracellular cholesterol transporter 1
ENSMUSG00000057766	18	12252362	12305797	Ankrd29	ankyrin repeat domain 29
ENSMUSG00000024421	18	12333819	12583013	Lama3	laminin, alpha 3
ENSMUSG00000024424	18	12599896	12738863	Ttc39c	tetratricopeptide repeat domain 39C
ENSMUSG00000024430	18	12740322	12755260	Cabyr	calcium-binding tyrosine-(Y)-phosphorylation regulated (fibrousheathin 2)
ENSMUSG00000044252	18	12755314	12941841	Osbpl1a	oxysterol binding protein-like 1A
ENSMUSG00000024423	18	12955852	12992950	Impact	impact, RWD domain protein
ENSMUSG00000037346	18	13006990	13022882	Hrh4	histamine receptor H4
ENSMUSG00000024420	18	13687013	13972787	Zfp521	zinc finger protein 521
ENSMUSG00000037013	18	14624198	14682914	Ss18	SS18, nBAF chromatin remodeling complex subunit
ENSMUSG00000036743	18	14706151	14762301	Psma8	proteasome subunit alpha 8
ENSMUSG00000054321	18	14783245	14900359	Taf4b	TATA-box binding protein associated factor 4b
ENSMUSG00000036225	18	14968685	15151446	Kctd1	potassium channel tetramerisation domain containing 1
ENSMUSG00000058152	18	59175401	59535999	Chsy3	chondroitin sulfate synthase 3
ENSMUSG00000054072	18	60376027	60392634	Iigp1	interferon inducible GTPase 1
ENSMUSG00000038059	18	60474191	60501987	Smim3	small integral membrane protein 3
ENSMUSG00000024603	18	60526185	60558766	Dctn4	dynactin 4
ENSMUSG00000024604	18	60560736	60572810	Rbm22	RNA binding motif protein 22
ENSMUSG00000049173	18	60573750	60591788	Myoz3	myozenin 3
ENSMUSG00000043079	18	60593973	60660142	Synpo	synaptopodin
ENSMUSG00000054008	18	60684494	60748650	Ndst1	N-deacetylase/N-sulfotransferase (heparan glucosaminyl) 1
ENSMUSG00000024608	18	60747098	60778546	Rps14	ribosomal protein S14
ENSMUSG00000024610	18	60803848	60812652	Cd74	CD74 antigen (invariant polypeptide of major histocompatibility complex, class II antigen-associated)
ENSMUSG00000024613	18	60813755	60848971	Tcof1	treacle ribosome biogenesis factor 1
ENSMUSG00000036412	18	60911780	60918561	Arsi	arylsulfatase i
ENSMUSG00000024617	18	60925618	60988152	Camk2a	calcium/calmodulin-dependent protein kinase II alpha
ENSMUSG00000052026	18	60995380	61014222	Slc6a7	solute carrier family 6 (neurotransmitter transporter, L-proline), member 7
ENSMUSG00000024619	18	61018862	61036199	Cdx1	caudal type homeobox 1
ENSMUSG00000024620	18	61045150	61085061	Pdgfrb	platelet derived growth factor receptor, beta polypeptide
ENSMUSG00000024621	18	61100598	61132149	Csf1r	colony stimulating factor 1 receptor
ENSMUSG00000024622	18	61131277	61177050	Hmgxb3	HMG box domain containing 3

## Sheet: MAT_BFMI_SNP
ensembl_gene_id	chromosome_name	start_position	end_position	mgi_symbol	mgi_description
ENSMUSG00000025907	1	6206197	6276648	Rb1cc1	RB1-inducible coiled-coil 1
ENSMUSG00000033740	1	6487231	6860940	St18	suppression of tumorigenicity 18
ENSMUSG00000045210	1	9718622	9748382	Vcpip1	valosin containing protein (p97)/p47 complex interacting protein 1
ENSMUSG00000046101	1	9908638	9942085	Mcmdc2	minichromosome maintenance domain containing 2
ENSMUSG00000048960	1	10993465	11303681	Prex2	phosphatidylinositol-3,4,5-trisphosphate-dependent Rac exchange factor 2
ENSMUSG00000041779	1	20996299	21079229	Tram2	translocating chain-associating membrane protein 2
ENSMUSG00000028207	4	9448069	9669344	Asph	aspartate-beta-hydroxylase
ENSMUSG00000029122	5	37289098	37336894	Evc	EvC ciliary complex subunit 1
ENSMUSG00000029123	5	37446825	37717171	Stk32b	serine/threonine kinase 32B
ENSMUSG00000051596	5	38275972	38304217	Otop1	otopetrin 1
ENSMUSG00000005107	5	38349273	38503143	Slc2a9	solute carrier family 2 (facilitated glucose transporter), member 9
ENSMUSG00000039315	5	38706462	38876812	Clnk	cytokine-dependent hematopoietic cell linker
ENSMUSG00000068748	6	22875502	23052916	Ptprz1	protein tyrosine phosphatase, receptor type Z, polypeptide 1
ENSMUSG00000029695	6	23072173	23132986	Aass	aminoadipate-semialdehyde synthase
ENSMUSG00000039116	10	14402583	14545659	Adgrg6	adhesion G protein-coupled receptor G6
ENSMUSG00000020609	12	7977648	8016835	Apob	apolipoprotein B
ENSMUSG00000020605	12	8313432	8343824	Hs1bp3	HCLS1 binding protein 3
ENSMUSG00000020583	12	8947929	8972028	Matn3	matrilin 3
ENSMUSG00000009734	13	18121098	18397686	Pou6f2	POU domain, class 6, transcription factor 2
ENSMUSG00000041138	13	19645078	19697794	Nme8	NME/NM23 family member 8
ENSMUSG00000021322	13	20794113	21036617	Aoah	acyloxyacyl hydrolase
ENSMUSG00000004341	13	21312125	21319624	Gpx6	glutathione peroxidase 6
ENSMUSG00000021327	13	21387003	21402755	Zkscan3	zinc finger with KRAB and SCAN domains 3
ENSMUSG00000054890	13	21553894	21559893	Olfr1535	olfactory receptor 1535
ENSMUSG00000051258	13	21610978	21614022	Olfr1362	olfactory receptor 1362
ENSMUSG00000024238	18	5591860	5775467	Zeb1	zinc finger E-box binding homeobox 1
ENSMUSG00000006740	18	6201002	6242174	Kif5b	kinesin family member 5B
ENSMUSG00000024240	18	6435951	6516108	Epc1	enhancer of polycomb homolog 1
ENSMUSG00000024293	18	10566507	10610352	Esco1	establishment of sister chromatid cohesion N-acetyltransferase 1
ENSMUSG00000049411	18	11964450	12121537	Tmem241	transmembrane protein 241
ENSMUSG00000024413	18	12189692	12236400	Npc1	NPC intracellular cholesterol transporter 1
ENSMUSG00000024421	18	12333819	12583013	Lama3	laminin, alpha 3
ENSMUSG00000058152	18	59175401	59535999	Chsy3	chondroitin sulfate synthase 3

## Sheet: PAT_B6N
ensembl_gene_id	chromosome_name	start_position	end_position	mgi_symbol	mgi_description
ENSMUSG00000027499	3	7366669	7445366	Pkia	protein kinase inhibitor, alpha
ENSMUSG00000043542	3	7503483	7553836	Zc2hc1a	zinc finger, C2HC-type containing 1A
ENSMUSG00000040329	3	7569994	7613760	Il7	interleukin 7
ENSMUSG00000027500	3	8509360	8561606	Stmn2	stathmin-like 2
ENSMUSG00000040289	3	8663359	8667256	Hey1	hairy/enhancer-of-split related with YRPW motif 1
ENSMUSG00000040269	3	8802146	8923918	Mrps28	mitochondrial ribosomal protein S28
ENSMUSG00000027506	3	8925593	9004723	Tpd52	tumor protein D52
ENSMUSG00000069114	3	9250602	9285333	Zbtb10	zinc finger and BTB domain containing 10
ENSMUSG00000040209	3	9427020	9610085	Zfp704	zinc finger protein 704
ENSMUSG00000027508	3	9687479	9833679	Pag1	phosphoprotein associated with glycosphingolipid microdomains 1
ENSMUSG00000027533	3	10012548	10016607	Fabp5	fatty acid binding protein 5, epidermal
ENSMUSG00000052468	3	10179851	10183929	Pmp2	peripheral myelin protein 2
ENSMUSG00000027528	3	10193621	10197283	Fabp9	fatty acid binding protein 9, testis
ENSMUSG00000062515	3	10204088	10208576	Fabp4	fatty acid binding protein 4, adipocyte
ENSMUSG00000027530	3	10244209	10301183	Fabp12	fatty acid binding protein 12
ENSMUSG00000027531	3	10311956	10331439	Impa1	inositol (myo)-1(or 4)-monophosphatase 1
ENSMUSG00000058921	3	10331734	10335656	Slc10a5	solute carrier family 10 (sodium/bile acid cotransporter family), member 5
ENSMUSG00000039795	3	10339953	10351317	Zfand1	zinc finger, AN1-type domain 1
ENSMUSG00000027536	3	10366907	10428856	Chmp4c	charged multivesicular body protein 4C
ENSMUSG00000027534	3	10417817	10440102	Snx16	sorting nexin 16
ENSMUSG00000039717	3	13471655	14182287	Ralyl	RALY RNA binding protein-like
ENSMUSG00000039710	3	14480697	14505830	Slc7a12	solute carrier family 7 (cationic amino acid transporter, y+ system), member 12
ENSMUSG00000027550	3	14533788	14572658	Lrrcc1	leucine rich repeat and coiled-coil domain containing 1
ENSMUSG00000027552	3	14578641	14606309	E2f5	E2F transcription factor 5
ENSMUSG00000078784	3	14606284	14611285	Rbis	ribosomal biogenesis factor
ENSMUSG00000027555	3	14641727	14663002	Car13	carbonic anhydrase 13
ENSMUSG00000027556	3	14766216	14808368	Car1	carbonic anhydrase 1
ENSMUSG00000040274	5	3341485	3531008	Cdk6	cyclin-dependent kinase 6
ENSMUSG00000058503	5	3543833	3570238	Fam133b	family with sequence similarity 133, member B
ENSMUSG00000040302	5	3583978	3596585	Rbm48	RNA binding motif protein 48
ENSMUSG00000005907	5	3596066	3637232	Pex1	peroxisomal biogenesis factor 1
ENSMUSG00000007415	5	3632932	3657185	Gatad1	GATA zinc finger domain containing 1
ENSMUSG00000014529	5	3651181	3680325	Tmbim7	transmembrane BAX inhibitor motif containing 7
ENSMUSG00000040351	5	3690000	3802925	Ankib1	ankyrin repeat and IBR domain containing 1
ENSMUSG00000000600	5	3803184	3845564	Krit1	KRIT1, ankyrin repeat containing
ENSMUSG00000040367	5	3845173	3866596	Lrrd1	leucine rich repeats and death domain containing 1
ENSMUSG00000040429	5	3890581	3893933	Mterf1a	mitochondrial transcription termination factor 1a
ENSMUSG00000040407	5	3928054	4081310	Akap9	A kinase (PRKA) anchor protein (yotiao) 9
ENSMUSG00000001467	5	4081145	4104746	Cyp51	cytochrome P450, family 51
ENSMUSG00000053178	5	4192367	4197651	Mterf1b	mitochondrial transcription termination factor 1b
ENSMUSG00000044674	5	4753839	4758035	Fzd1	frizzled class receptor 1
ENSMUSG00000028926	5	4803391	5420312	Cdk14	cyclin-dependent kinase 14
ENSMUSG00000046798	5	5489537	5514958	Cldn12	claudin 12
ENSMUSG00000040464	5	5537454	5559538	Gtpbp10	GTP-binding protein 10 (putative)
ENSMUSG00000040473	5	5579278	5664239	Cfap69	cilia and flagella associated protein 69
ENSMUSG00000015653	5	5664829	5694578	Steap2	six transmembrane epithelial antigen of prostate 2
ENSMUSG00000015652	5	5736317	5749326	Steap1	six transmembrane epithelial antigen of the prostate 1
ENSMUSG00000092094	5	6769010	7344756	Zfp804b	zinc finger protein 804B
ENSMUSG00000040514	5	7304119	7311491	Tex47	testis expressed 47
ENSMUSG00000012428	5	7960457	7982213	Steap4	STEAP family member 4
ENSMUSG00000003161	5	8046078	8069379	Sri	sorcin
ENSMUSG00000040537	5	8072352	8368160	Adam22	a disintegrin and metallopeptidase domain 22
ENSMUSG00000002297	5	8396973	8422716	Dbf4	DBF4 zinc finger
ENSMUSG00000054099	5	8422850	8454797	Slc25a40	solute carrier family 25, member 40
ENSMUSG00000040570	5	8490334	8622952	Rundc3b	RUN domain containing 3B
ENSMUSG00000040584	5	8660077	8748575	Abcb1a	ATP-binding cassette, sub-family B (MDR/TAP), member 1A
ENSMUSG00000028970	5	8798147	8866315	Abcb1b	ATP-binding cassette, sub-family B (MDR/TAP), member 1B
ENSMUSG00000042476	5	8893717	8959231	Abcb4	ATP-binding cassette, sub-family B (MDR/TAP), member 4
ENSMUSG00000003623	5	8966033	8997324	Crot	carnitine O-octanoyltransferase
ENSMUSG00000079659	5	9100668	9160986	Tmem243	transmembrane protein 243, mitochondrial
ENSMUSG00000042508	5	9118801	9161776	Dmtf1	cyclin D binding myb-like transcription factor 1
ENSMUSG00000003974	5	9485541	9725170	Grm3	glutamate receptor, metabotropic 3
ENSMUSG00000045294	5	28071363	28078662	Insig1	insulin induced gene 1
ENSMUSG00000039095	5	28165694	28172166	En2	engrailed 2
ENSMUSG00000044681	5	28200819	28245806	Cnpy1	canopy FGF signaling regulator 1
ENSMUSG00000011958	9	69989466	70008317	Bnip2	BCL2/adenovirus E1B interacting protein 2
ENSMUSG00000033543	9	70012550	70022866	Gtf2a2	general transcription factor II A, 2
ENSMUSG00000032226	9	70031496	70038088	Gcnt3	glucosaminyl (N-acetyl) transferase 3, mucin type
ENSMUSG00000032224	9	70088511	70142560	Fam81a	family with sequence similarity 81, member A
ENSMUSG00000032220	9	70207350	70399766	Myo1e	myosin IE
ENSMUSG00000032218	9	70407692	70421547	Ccnb2	cyclin B2
ENSMUSG00000032217	9	70425424	70503725	Rnf111	ring finger 111
ENSMUSG00000032212	9	70542754	70592234	Sltm	SAFB-like, transcription modulator
ENSMUSG00000042444	9	70599014	70657174	Mindy2	MINDY lysine 48 deubiquitinase 2
ENSMUSG00000054693	9	70678997	70780229	Adam10	a disintegrin and metallopeptidase domain 10
ENSMUSG00000032207	9	70798128	70952226	Lipc	lipase, hepatic
ENSMUSG00000032204	9	71110659	71168682	Aqp9	aquaporin 9
ENSMUSG00000013584	9	71215789	71296243	Aldh1a2	aldehyde dehydrogenase family 1, subfamily A2
ENSMUSG00000032199	9	71478437	71485935	Polr2m	polymerase (RNA) II (DNA directed) polypeptide M
ENSMUSG00000041361	9	71504347	71592360	Myzap	myocardial zonula adherens protein
ENSMUSG00000032232	9	71626509	71771602	Cgnl1	cingulin-like 1
ENSMUSG00000032228	9	71842688	72111871	Tcf12	transcription factor 12
ENSMUSG00000038535	9	72274860	72363777	Zfp280d	zinc finger protein 280D
ENSMUSG00000032221	9	72438011	72462025	Mns1	meiosis-specific nuclear structural protein 1
ENSMUSG00000090626	9	72450394	72492212	Tex9	testis expressed gene 9
ENSMUSG00000037674	9	72532240	72622937	Rfx7	regulatory factor X, 7
ENSMUSG00000032216	9	72662346	72749852	Nedd4	neural precursor cell expressed, developmentally down-regulated 4
ENSMUSG00000036030	9	72806874	72917291	Prtg	protogenin
ENSMUSG00000034910	9	72925645	72952181	Pygo1	pygopus 1
ENSMUSG00000092192	9	72958785	72973064	Dnaaf4	dynein axonemal assembly factor 4
ENSMUSG00000086158	9	72979722	72985382	Ccpg1os	cell cycle progression 1, opposite strand
ENSMUSG00000034563	9	72985429	73016340	Ccpg1	cell cycle progression 1
ENSMUSG00000079469	9	73007419	73040378	Pigb	phosphatidylinositol glycan anchor biosynthesis, class B
ENSMUSG00000098332	9	73039718	73042779	Pigbos1	Pigb opposite strand 1
ENSMUSG00000032202	9	73044854	73097629	Rab27a	RAB27A, member RAS oncogene family
ENSMUSG00000092622	9	73101836	73104438	Khdc3	KH domain containing 3, subcortical maternal complex member
ENSMUSG00000032215	9	73113426	73123333	Rsl24d1	ribosomal L24 domain containing 1
ENSMUSG00000062151	9	73479422	73968966	Unc13c	unc-13 homolog C
ENSMUSG00000044976	9	74110356	74283308	Wdr72	WD repeat domain 72
ENSMUSG00000043013	9	74861921	74891781	Onecut1	one cut domain, family member 1
ENSMUSG00000034858	9	74952884	75032468	Fam214a	family with sequence similarity 214, member A
ENSMUSG00000007656	9	75037614	75060313	Arpp19	cAMP-regulated phosphoprotein 19
ENSMUSG00000034593	9	75071015	75223688	Myo5a	myosin VA
ENSMUSG00000033590	9	75232020	75305451	Myo5c	myosin VC
ENSMUSG00000032192	9	75306288	75345876	Gnb5	guanine nucleotide binding protein (G protein), beta 5
ENSMUSG00000032191	9	75347758	75351649	Bcl2l10	Bcl2-like 10
ENSMUSG00000042688	9	75369062	75410005	Mapk6	mitogen-activated protein kinase 6
ENSMUSG00000042487	9	75441524	75466432	Leo1	Leo1, Paf1/RNA polymerase II complex component
ENSMUSG00000058587	9	75497707	75559657	Tmod3	tropomodulin 3
ENSMUSG00000032186	9	75565621	75611325	Tmod2	tropomodulin 2
ENSMUSG00000032184	9	75625741	75637771	Lysmd2	LysM, putative peptidoglycan-binding, domain containing 2
ENSMUSG00000032181	9	75643189	75684056	Scg3	secretogranin III
ENSMUSG00000032265	9	85320439	85327348	Tent5a	terminal nucleotidyltransferase 5A
ENSMUSG00000035941	9	85687360	85749334	Ibtk	inhibitor of Bruton agammaglobulinemia tyrosine kinase
ENSMUSG00000035274	9	85842380	85847040	Tpbg	trophoblast glycoprotein
ENSMUSG00000032415	9	86307306	86464950	Ube2cbp	ubiquitin-conjugating enzyme E2C binding protein
ENSMUSG00000034973	9	86467154	86555923	Dop1a	DOP1 leucine zipper like protein A
ENSMUSG00000056131	9	86554377	86571842	Pgm3	phosphoglucomutase 3
ENSMUSG00000032417	9	86571991	86574899	Rwdd2a	RWD domain containing 2A
ENSMUSG00000032418	9	86581371	86695953	Me1	malic enzyme 1, NADP(+)-dependent, cytosolic
ENSMUSG00000033491	9	86743649	86758443	Prss35	protease, serine 35
ENSMUSG00000033419	9	86765923	86880654	Snap91	synaptosomal-associated protein 91
ENSMUSG00000020034	10	84576626	84614359	Tcp11l2	t-complex 11 (mouse) like 2
ENSMUSG00000034453	10	84622292	84727178	Polr3b	polymerase (RNA) III (DNA directed) polypeptide B
ENSMUSG00000020037	10	84756062	84906538	Rfx4	regulatory factor X, 4 (influences HLA class II expression)
ENSMUSG00000035620	10	84917616	85018337	Ric8b	RIC8 guanine nucleotide exchange factor B
ENSMUSG00000050035	10	85096287	85102495	Fhl4	four and a half LIM domains 4
ENSMUSG00000060935	10	85102627	85120618	Tmem263	transmembrane protein 263
ENSMUSG00000049038	10	85119433	85128027	Mterf2	mitochondrial transcription termination factor 2
ENSMUSG00000020038	10	85131700	85185064	Cry1	cryptochrome 1 (photolyase-like)
ENSMUSG00000020042	10	85386814	85660292	Btbd11	BTB (POZ) domain containing 11
ENSMUSG00000001785	10	85829494	85889096	Pwp1	PWP1 homolog, endonuclein
ENSMUSG00000035529	10	85891966	85917142	Prdm4	PR domain containing 4
ENSMUSG00000085111	10	85927681	85946206	Ascl4	achaete-scute family bHLH transcription factor 4
ENSMUSG00000001783	10	85938637	85957823	Rtcb	RNA 2',3'-cyclic phosphate and 5'-OH ligase
ENSMUSG00000050108	10	85959340	86011895	Bpifc	BPI fold containing family C
ENSMUSG00000001786	10	86021972	86051873	Fbxo7	F-box protein 7
ENSMUSG00000059602	10	86055125	86498896	Syn3	synapsin III
ENSMUSG00000020044	10	86300372	86349506	Timp3	tissue inhibitor of metalloproteinase 3
ENSMUSG00000020048	10	86690209	86705509	Hsp90b1	heat shock protein 90, beta (Grp94), member 1
ENSMUSG00000044937	10	86705811	86776844	Ttc41	tetratricopeptide repeat domain 41
ENSMUSG00000054027	10	86779005	86838389	Nt5dc3	5'-nucleotidase domain containing 3
ENSMUSG00000035459	10	86841198	87008025	Stab2	stabilin 2
ENSMUSG00000025278	14	7817957	7951588	Flnb	filamin, beta
ENSMUSG00000025279	14	7964533	7994573	Dnase1l3	deoxyribonuclease 1-like 3
ENSMUSG00000025277	14	8002902	8056763	Abhd6	abhydrolase domain containing 6
ENSMUSG00000023156	14	8080367	8091834	Rpp14	ribonuclease P 14 subunit
ENSMUSG00000033885	14	8098211	8165117	Pxk	PX domain containing serine/threonine kinase
ENSMUSG00000021748	14	8165996	8173025	Pdhb	pyruvate dehydrogenase (lipoamide) beta
ENSMUSG00000021752	14	8214140	8223563	Kctd6	potassium channel tetramerisation domain containing 6
ENSMUSG00000021751	14	8225511	8259353	Acox2	acyl-Coenzyme A oxidase 2, branched chain
ENSMUSG00000021750	14	8296274	8318023	Fam107a	family with sequence similarity 107, member A
ENSMUSG00000021749	14	8348937	8378754	Oit1	oncoprotein induced transcript 1
ENSMUSG00000060579	14	9550092	11162035	Fhit	fragile histidine triad gene
ENSMUSG00000021745	14	11553532	12242041	Ptprg	protein tyrosine phosphatase, receptor type, G
ENSMUSG00000021743	14	12342094	12348189	Fezf2	Fez family zinc finger 2
ENSMUSG00000054423	14	12372563	12823079	Cadps	Ca2+-dependent secretion activator
ENSMUSG00000056296	14	13284780	13616340	Synpr	synaptoporin
ENSMUSG00000044772	14	13670876	13683148	Sntn	sentan, cilia apical structure protein
ENSMUSG00000053453	14	13949012	13961852	Thoc7	THO complex 7
ENSMUSG00000021738	14	13961440	14107302	Atxn7	ataxin 7
ENSMUSG00000021737	14	14112174	14120984	Psmd6	proteasome (prosome, macropain) 26S subunit, non-ATPase, 6
ENSMUSG00000052417	14	14171738	14186838	Olfr720	olfactory receptor 720
ENSMUSG00000072707	14	14322828	14331791	Olfr31	olfactory receptor 31
ENSMUSG00000068758	14	14346275	14356011	Il3ra	interleukin 3 receptor, alpha chain
ENSMUSG00000091809	14	14401298	14410095	Olfr721-ps1	olfactory receptor 721, pseudogene 1
ENSMUSG00000021733	14	14702279	14799940	Slc4a7	solute carrier family 4, sodium bicarbonate cotransporter, member 7
ENSMUSG00000042567	14	14803415	15012059	Nek10	NIMA (never in mitosis gene a)- related kinase 10
ENSMUSG00000045201	14	15357515	15438987	Lrrc3b	leucine rich repeat containing 3B
ENSMUSG00000021786	14	16238652	16249808	Oxsm	3-oxoacyl-ACP synthase, mitochondrial
ENSMUSG00000021785	14	16249280	16311926	Ngly1	N-glycanase 1
ENSMUSG00000017485	14	16365179	16435462	Top2b	topoisomerase (DNA) II beta
ENSMUSG00000017491	14	16430839	16819156	Rarb	retinoic acid receptor, beta
ENSMUSG00000021779	14	17660261	18038090	Thrb	thyroid hormone receptor beta
ENSMUSG00000021775	14	18204054	18239127	Nr1d2	nuclear receptor subfamily 1, group D, member 2
ENSMUSG00000012405	14	18267823	18271391	Rpl15	ribosomal protein L15
ENSMUSG00000021772	14	18271136	18284003	Nkiras1	NFKB inhibitor interacting Ras-like protein 1
ENSMUSG00000021774	14	18282722	18331859	Ube2e1	ubiquitin-conjugating enzyme E2E 1
ENSMUSG00000058317	14	18573575	18894267	Ube2e2	ubiquitin-conjugating enzyme E2E 2
ENSMUSG00000008658	16	5885355	7411526	Rbfox1	RNA binding protein, fox-1 homolog (C. elegans) 1
ENSMUSG00000022715	16	8409275	8425136	Tmem114	transmembrane protein 114
ENSMUSG00000039345	16	8470788	8490684	Mettl22	methyltransferase like 22
ENSMUSG00000057880	16	8513429	8621568	Abat	4-aminobutyrate aminotransferase
ENSMUSG00000043140	16	8633229	8637712	Tmem186	transmembrane protein 186
ENSMUSG00000022711	16	8637674	8662467	Pmm2	phosphomannomutase 2
ENSMUSG00000008393	16	8658580	8672155	Carhsp1	calcium regulated heat stable protein 1
ENSMUSG00000022710	16	8689595	8792308	Usp7	ubiquitin specific peptidase 7
ENSMUSG00000059003	16	9567898	9995560	Grin2a	glutamate receptor, ionotropic, NMDA2A (epsilon 1)
ENSMUSG00000039209	16	10170226	10174911	Rpl39l	ribosomal protein L39-like
ENSMUSG00000039200	16	10192712	10251478	Atf7ip2	activating transcription factor 7 interacting protein 2
ENSMUSG00000022505	16	10281749	10313968	Emp2	epithelial membrane protein 2
ENSMUSG00000039179	16	10357948	10395490	Tekt5	tektin 5
ENSMUSG00000022503	16	10411948	10424428	Nubp1	nucleotide binding protein 1
ENSMUSG00000050908	16	10420557	10447362	Tvp23a	trans-golgi network vesicle protein 23A
ENSMUSG00000022504	16	10480059	10528418	Ciita	class II transactivator
ENSMUSG00000038055	16	10502531	10543054	Dexi	dexamethasone-induced transcript
ENSMUSG00000068663	16	10545339	10744878	Clec16a	C-type lectin domain family 16, member A
ENSMUSG00000038037	16	10782240	10785536	Socs1	suppressor of cytokine signaling 1
ENSMUSG00000043050	16	10787936	10788660	Tnp2	transition protein 2
ENSMUSG00000050058	16	10790505	10790914	Prm3	protamine 3
ENSMUSG00000038015	16	10791380	10796134	Prm2	protamine 2
ENSMUSG00000022501	16	10796326	10805839	Prm1	protamine 1
ENSMUSG00000037991	16	10835059	10892966	Rmi2	RecQ mediated genome instability 2
ENSMUSG00000022500	16	10959275	11066157	Litaf	LPS-induced TN factor
ENSMUSG00000037972	16	11060945	11074985	Snn	stannin
ENSMUSG00000022498	16	11074911	11134650	Txndc11	thioredoxin domain containing 11
ENSMUSG00000037965	16	11136592	11176393	Zc3h7a	zinc finger CCCH type containing 7 A
ENSMUSG00000005846	16	11192970	11203331	Rsl1d1	ribosomal L1 domain containing 1
ENSMUSG00000062203	16	11219292	11254325	Gspt1	G1 to S phase transition 1
ENSMUSG00000022496	16	11313812	11320074	Tnfrsf17	tumor necrosis factor receptor superfamily, member 17
ENSMUSG00000071669	16	11322908	11755472	Snx29	sorting nexin 29
ENSMUSG00000065979	16	11803721	11909445	Cpped1	calcineurin-like phosphoesterase domain containing 1
ENSMUSG00000022494	16	11984113	12270902	Shisa9	shisa family member 9
ENSMUSG00000022545	16	13109684	13150617	Ercc4	excision repair cross-complementing rodent repair deficiency, complementation group 4
ENSMUSG00000009569	16	13256481	13417529	Mrtfb	myocardin related transcription factor B
ENSMUSG00000022685	16	13537960	13668170	Parn	poly(A)-specific ribonuclease (deadenylation nuclease)
ENSMUSG00000022684	16	13671858	13703612	Bfar	bifunctional apoptosis regulator
ENSMUSG00000022683	16	13715057	13730983	Pla2g10	phospholipase A2, group X
ENSMUSG00000022682	16	13780708	13814839	Rrn3	RRN3 RNA polymerase I transcription factor homolog (yeast)
ENSMUSG00000022681	16	13818845	13835451	Ntan1	N-terminal Asn amidase
ENSMUSG00000022680	16	13833148	13903131	Pdxdc1	pyridoxal-dependent decarboxylase domain containing 1
ENSMUSG00000022679	16	13903161	13949619	Mpv17l	Mpv17 transgene, kidney disease mutant-like
ENSMUSG00000065968	16	13981699	13986888	Ifitm7	interferon induced transmembrane protein 7
ENSMUSG00000044117	16	13986604	14101500	Bmerb1	bMERB domain containing 1
ENSMUSG00000060657	16	14109173	14163351	Marf1	meiosis regulator and mRNA stability 1
ENSMUSG00000023800	17	3326573	3531344	Tiam2	T cell lymphoma invasion and metastasis 2
ENSMUSG00000036983	17	3519256	3557781	Tfb1m	transcription factor B1, mitochondrial
ENSMUSG00000091530	17	3532554	3533213	Cldn20	claudin 20
ENSMUSG00000023802	17	3635240	3696261	Nox3	NADPH oxidase 3
ENSMUSG00000069729	17	4994332	5347656	Arid1b	AT rich interactive domain 1B (SWI-like)
ENSMUSG00000004945	17	5410870	5440259	Tmem242	transmembrane protein 242
ENSMUSG00000101959	17	5417323	5418767	Ldhal6b	lactate dehydrogenase A-like 6B
ENSMUSG00000034265	17	5492557	5753811	Zdhhc14	zinc finger, DHHC domain containing 14
ENSMUSG00000002365	17	5841329	5931954	Snx9	sorting nexin 9
ENSMUSG00000023805	17	5941280	6044290	Synj2	synaptojanin 2
ENSMUSG00000015659	17	6042196	6079741	Serac1	serine active site containing 1
ENSMUSG00000034345	17	6079786	6086517	Gtf2h5	general transcription factor IIH, polypeptide 5
ENSMUSG00000034377	17	6106437	6251128	Tulp4	tubby like protein 4
ENSMUSG00000038141	17	6256860	6308314	Tmem181a	transmembrane protein 181A
ENSMUSG00000092074	17	6306340	6317500	Dynlt1a	dynein light chain Tctex-type 1A
ENSMUSG00000096255	17	6430112	6436296	Dynlt1b	dynein light chain Tctex-type 1B
ENSMUSG00000000579	17	6601671	6609774	Dynlt1c	dynein light chain Tctex-type 1C
ENSMUSG00000095677	17	6646602	6655900	Dynlt1f	dynein light chain Tctex-type 1F
ENSMUSG00000041831	17	6659093	6738044	Sytl3	synaptotagmin-like 3
ENSMUSG00000052397	17	6738041	6782784	Ezr	ezrin
ENSMUSG00000023806	17	6904413	6948682	Rsph3b	radial spoke 3B homolog (Chlamydomonas)
ENSMUSG00000052031	17	6955011	6961156	Tagap1	T cell activation GTPase activating protein 1
ENSMUSG00000094724	17	6970634	7011299	Rnaset2b	ribonuclease T2B
ENSMUSG00000023809	17	7170115	7303315	Rps6ka2	ribosomal protein S6 kinase, polypeptide 2
ENSMUSG00000071322	17	7324646	7345974	Tcp10a	t-complex protein 10a
ENSMUSG00000079722	17	7350885	7352696	Ttll2	tubulin tyrosine ligase-like family, member 2
ENSMUSG00000056133	17	7362815	7385464	Unc93a2	unc-93 homolog A2
ENSMUSG00000071984	17	7738569	7827302	Fndc1	fibronectin type III domain containing 1
ENSMUSG00000033450	17	7926000	7934897	Tagap	T cell activation Rho GTPase activating protein
ENSMUSG00000073471	17	7945614	7979824	Rsph3a	radial spoke 3A homolog (Chlamydomonas)
ENSMUSG00000095687	17	8115445	8148097	Rnaset2a	ribonuclease T2A
ENSMUSG00000069135	17	8165501	8196804	Fgfr1op	Fgfr1 oncogene partner
ENSMUSG00000040899	17	8236043	8257141	Ccr6	chemokine (C-C motif) receptor 6
ENSMUSG00000023861	17	8282904	8297661	Mpc1	mitochondrial pyruvate carrier 1
ENSMUSG00000073468	17	8311102	8327442	Sft2d1	SFT2 domain containing 1
ENSMUSG00000055945	17	8337459	8344113	Prr18	proline rich 18
ENSMUSG00000058159	17	8355992	8423513	T2	brachyury 2
ENSMUSG00000062327	17	8434423	8442496	T	brachyury, T-box transcription factor T
ENSMUSG00000023868	17	8525372	8986648	Pde10a	phosphodiesterase 10A
ENSMUSG00000046173	17	9666495	9669717	Pabpc6	poly(A) binding protein, cytoplasmic 6
ENSMUSG00000062078	17	10202601	10319854	Qk	quaking
ENSMUSG00000037196	17	10403012	10840311	Pacrg	PARK2 co-regulated
ENSMUSG00000023826	17	10840384	12063361	Prkn	parkin RBR E3 ubiquitin protein ligase
ENSMUSG00000023980	17	47483364	47502292	Taf8	TATA-box binding protein associated factor 8
ENSMUSG00000034165	17	47505051	47599691	Ccnd3	cyclin D3
ENSMUSG00000023988	17	47599331	47611492	Bysl	bystin-like
ENSMUSG00000092558	17	47611582	47624418	Med20	mediator complex subunit 20
ENSMUSG00000090115	17	47630690	47686738	Usp49	ubiquitin specific peptidase 49
ENSMUSG00000033475	17	47686646	47688386	Tomm6	translocase of outer mitochondrial membrane 6
ENSMUSG00000096549	17	47688517	47694736	Prickle4	prickle planar cell polarity protein 4
ENSMUSG00000023266	17	47689030	47704286	Frs3	fibroblast growth factor receptor substrate 3
ENSMUSG00000023987	17	47726842	47734482	Pgc	progastricsin (pepsinogen C)
ENSMUSG00000023990	17	47737030	47792419	Tfeb	transcription factor EB
ENSMUSG00000032717	17	47815328	47834691	Mdfi	MyoD family inhibitor
ENSMUSG00000023991	17	47867133	47924645	Foxp4	forkhead box P4
ENSMUSG00000042265	17	48232768	48246924	Trem1	triggering receptor expressed on myeloid cells 1
ENSMUSG00000041754	17	48247777	48258841	Trem3	triggering receptor expressed on myeloid cells 3
ENSMUSG00000051682	17	48264295	48275360	Treml4	triggering receptor expressed on myeloid cells-like 4
ENSMUSG00000071068	17	48299498	48312533	Treml2	triggering receptor expressed on myeloid cells-like 2
ENSMUSG00000023992	17	48346401	48354147	Trem2	triggering receptor expressed on myeloid cells 2
ENSMUSG00000023993	17	48359916	48367176	Treml1	triggering receptor expressed on myeloid cells-like 1
ENSMUSG00000023994	17	48386885	48409906	Nfya	nuclear transcription factor-Y alpha
ENSMUSG00000040771	17	48410014	48417266	Oard1	O-acyl-ADP-ribose deacylase 1
ENSMUSG00000040694	17	48419231	48432930	Apobec2	apolipoprotein B mRNA editing enzyme, catalytic polypeptide 2
ENSMUSG00000023995	17	48447907	48451522	Tspo2	translocator protein 2
ENSMUSG00000043592	17	48454901	48539714	Unc5cl	unc-5 family C-terminal like
ENSMUSG00000040490	17	48932379	49097588	Lrfn2	leucine rich repeat and fibronectin type III domain containing 2
ENSMUSG00000064120	17	49428362	49455435	Mocs1	molybdenum cofactor synthesis 1
ENSMUSG00000040260	17	49456022	49564343	Daam2	dishevelled associated activator of morphogenesis 2
ENSMUSG00000023999	17	49615136	49909847	Kif6	kinesin family member 6
ENSMUSG00000039316	17	49992257	50190674	Rftn1	raftlin lipid raft linker 1
ENSMUSG00000024665	19	10062765	10101746	Fads2	fatty acid desaturase 2
ENSMUSG00000010663	19	10182888	10196877	Fads1	fatty acid desaturase 1
ENSMUSG00000024742	19	10199132	10204169	Fen1	flap structure specific endonuclease 1
ENSMUSG00000036372	19	10204014	10207824	Tmem258	transmembrane protein 258
ENSMUSG00000036098	19	10208272	10240748	Myrf	myelin regulatory factor
ENSMUSG00000035735	19	10245265	10304877	Dagla	diacylglycerol lipase, alpha
ENSMUSG00000024743	19	10389090	10453180	Syt7	synaptotagmin VII
ENSMUSG00000090291	19	10455371	10457473	Lrrc10b	leucine rich repeat containing 10B
ENSMUSG00000035179	19	10474235	10482928	Ppp1r32	protein phosphatase 1, regulatory subunit 32
ENSMUSG00000024668	19	10500534	10526142	Sdhaf2	succinate dehydrogenase complex assembly factor 2
ENSMUSG00000034820	19	10525266	10547653	Cpsf7	cleavage and polyadenylation specific factor 7
ENSMUSG00000024667	19	10533865	10556238	Tmem216	transmembrane protein 216
ENSMUSG00000024666	19	10570478	10577362	Tmem138	transmembrane protein 138
ENSMUSG00000034445	19	10577172	10595961	Cyb561a3	cytochrome b561 family, member A3
ENSMUSG00000034371	19	10587791	10605654	Tkfc	triokinase, FMN cyclase
ENSMUSG00000024740	19	10605327	10629819	Ddb1	damage specific DNA binding protein 1
ENSMUSG00000043789	19	10634213	10666213	Vwce	von Willebrand factor C and EGF domains
ENSMUSG00000033207	19	23302609	23448442	Mamdc2	MAM domain containing 2
ENSMUSG00000074925	19	23687429	23731668	Ptar1	protein prenyltransferase alpha subunit repeat containing 1
ENSMUSG00000024897	19	23758887	23949596	Apba1	amyloid beta (A4) precursor protein binding, family A, member 1
ENSMUSG00000071604	19	23972750	24031019	Fam189a2	family with sequence similarity 189, member A2
ENSMUSG00000024812	19	24094505	24225030	Tjp2	tight junction protein 2
ENSMUSG00000059363	19	24261453	24280605	Fxn	frataxin
ENSMUSG00000024867	19	24294794	24555872	Pip5k1b	phosphatidylinositol-4-phosphate 5-kinase, type 1 beta
ENSMUSG00000074922	19	24476502	24477356	Fam122a	family with sequence similarity 122, member A
ENSMUSG00000048572	19	24674008	24682233	Tmem252	transmembrane protein 252
ENSMUSG00000041731	19	24683016	24861855	Pgm5	phosphoglucomutase 5
ENSMUSG00000013662	19	32671638	32739786	Atad1	ATPase family, AAA domain containing 1
ENSMUSG00000013663	19	32757497	32826160	Pten	phosphatase and tensin homolog
ENSMUSG00000079344	19	33498037	33517780	Lipo4	lipase, member O4
ENSMUSG00000024766	19	33555160	33761951	Lipo3	lipase, member O3
ENSMUSG00000087303	19	33719670	33751359	Lipo2	lipase, member O2
ENSMUSG00000079342	19	33775498	33787459	Lipo1	lipase, member O1
ENSMUSG00000024768	19	33961187	33976810	Lipf	lipase, gastric
ENSMUSG00000024771	19	34008290	34047835	Lipk	lipase, family member K
ENSMUSG00000024770	19	34067358	34084918	Lipn	lipase, family member N
ENSMUSG00000056078	19	34100933	34122687	Lipm	lipase, family member M
ENSMUSG00000024774	19	34121469	34166053	Ankrd22	ankyrin repeat domain 22
ENSMUSG00000024776	19	34192229	34240333	Stambpl1	STAM binding protein like 1

## Sheet: PAT_B6N_SNP
ensembl_gene_id	chromosome_name	start_position	end_position	mgi_symbol	mgi_description
ENSMUSG00000040407	5	3928054	4081310	Akap9	A kinase (PRKA) anchor protein (yotiao) 9
ENSMUSG00000012428	5	7960457	7982213	Steap4	STEAP family member 4
ENSMUSG00000002297	5	8396973	8422716	Dbf4	DBF4 zinc finger
ENSMUSG00000032220	9	70207350	70399766	Myo1e	myosin IE
ENSMUSG00000032232	9	71626509	71771602	Cgnl1	cingulin-like 1
ENSMUSG00000090626	9	72450394	72492212	Tex9	testis expressed gene 9
ENSMUSG00000037674	9	72532240	72622937	Rfx7	regulatory factor X, 7
ENSMUSG00000044976	9	74110356	74283308	Wdr72	WD repeat domain 72
ENSMUSG00000034858	9	74952884	75032468	Fam214a	family with sequence similarity 214, member A
ENSMUSG00000033590	9	75232020	75305451	Myo5c	myosin VC
ENSMUSG00000025278	14	7817957	7951588	Flnb	filamin, beta
ENSMUSG00000025279	14	7964533	7994573	Dnase1l3	deoxyribonuclease 1-like 3
ENSMUSG00000033885	14	8098211	8165117	Pxk	PX domain containing serine/threonine kinase
ENSMUSG00000021738	14	13961440	14107302	Atxn7	ataxin 7
ENSMUSG00000021786	14	16238652	16249808	Oxsm	3-oxoacyl-ACP synthase, mitochondrial
ENSMUSG00000022503	16	10411948	10424428	Nubp1	nucleotide binding protein 1
ENSMUSG00000050908	16	10420557	10447362	Tvp23a	trans-golgi network vesicle protein 23A
ENSMUSG00000022504	16	10480059	10528418	Ciita	class II transactivator
ENSMUSG00000068663	16	10545339	10744878	Clec16a	C-type lectin domain family 16, member A
ENSMUSG00000037991	16	10835059	10892966	Rmi2	RecQ mediated genome instability 2
ENSMUSG00000022498	16	11074911	11134650	Txndc11	thioredoxin domain containing 11
ENSMUSG00000037965	16	11136592	11176393	Zc3h7a	zinc finger CCCH type containing 7 A
ENSMUSG00000005846	16	11192970	11203331	Rsl1d1	ribosomal L1 domain containing 1
ENSMUSG00000071669	16	11322908	11755472	Snx29	sorting nexin 29
ENSMUSG00000022545	16	13109684	13150617	Ercc4	excision repair cross-complementing rodent repair deficiency, complementation group 4
ENSMUSG00000009569	16	13256481	13417529	Mrtfb	myocardin related transcription factor B
ENSMUSG00000022680	16	13833148	13903131	Pdxdc1	pyridoxal-dependent decarboxylase domain containing 1
ENSMUSG00000023800	17	3326573	3531344	Tiam2	T cell lymphoma invasion and metastasis 2
ENSMUSG00000023805	17	5941280	6044290	Synj2	synaptojanin 2
ENSMUSG00000071984	17	7738569	7827302	Fndc1	fibronectin type III domain containing 1
ENSMUSG00000046173	17	9666495	9669717	Pabpc6	poly(A) binding protein, cytoplasmic 6
ENSMUSG00000034165	17	47505051	47599691	Ccnd3	cyclin D3
ENSMUSG00000071068	17	48299498	48312533	Treml2	triggering receptor expressed on myeloid cells-like 2
ENSMUSG00000043592	17	48454901	48539714	Unc5cl	unc-5 family C-terminal like
ENSMUSG00000039316	17	49992257	50190674	Rftn1	raftlin lipid raft linker 1
ENSMUSG00000024665	19	10062765	10101746	Fads2	fatty acid desaturase 2
ENSMUSG00000035179	19	10474235	10482928	Ppp1r32	protein phosphatase 1, regulatory subunit 32
ENSMUSG00000024668	19	10500534	10526142	Sdhaf2	succinate dehydrogenase complex assembly factor 2
ENSMUSG00000043789	19	10634213	10666213	Vwce	von Willebrand factor C and EGF domains
ENSMUSG00000033207	19	23302609	23448442	Mamdc2	MAM domain containing 2
ENSMUSG00000071604	19	23972750	24031019	Fam189a2	family with sequence similarity 189, member A2
ENSMUSG00000059363	19	24261453	24280605	Fxn	frataxin
ENSMUSG00000024776	19	34192229	34240333	Stambpl1	STAM binding protein like 1

## Sheet: MAT_B6N
ensembl_gene_id	chromosome_name	start_position	end_position	mgi_symbol	mgi_description
ENSMUSG00000027499	3	7366669	7445366	Pkia	protein kinase inhibitor, alpha
ENSMUSG00000043542	3	7503483	7553836	Zc2hc1a	zinc finger, C2HC-type containing 1A
ENSMUSG00000040329	3	7569994	7613760	Il7	interleukin 7
ENSMUSG00000027500	3	8509360	8561606	Stmn2	stathmin-like 2
ENSMUSG00000040289	3	8663359	8667256	Hey1	hairy/enhancer-of-split related with YRPW motif 1
ENSMUSG00000040269	3	8802146	8923918	Mrps28	mitochondrial ribosomal protein S28
ENSMUSG00000027506	3	8925593	9004723	Tpd52	tumor protein D52
ENSMUSG00000069114	3	9250602	9285333	Zbtb10	zinc finger and BTB domain containing 10
ENSMUSG00000040209	3	9427020	9610085	Zfp704	zinc finger protein 704
ENSMUSG00000027508	3	9687479	9833679	Pag1	phosphoprotein associated with glycosphingolipid microdomains 1
ENSMUSG00000027533	3	10012548	10016607	Fabp5	fatty acid binding protein 5, epidermal
ENSMUSG00000052468	3	10179851	10183929	Pmp2	peripheral myelin protein 2
ENSMUSG00000027528	3	10193621	10197283	Fabp9	fatty acid binding protein 9, testis
ENSMUSG00000062515	3	10204088	10208576	Fabp4	fatty acid binding protein 4, adipocyte
ENSMUSG00000027530	3	10244209	10301183	Fabp12	fatty acid binding protein 12
ENSMUSG00000027531	3	10311956	10331439	Impa1	inositol (myo)-1(or 4)-monophosphatase 1
ENSMUSG00000058921	3	10331734	10335656	Slc10a5	solute carrier family 10 (sodium/bile acid cotransporter family), member 5
ENSMUSG00000039795	3	10339953	10351317	Zfand1	zinc finger, AN1-type domain 1
ENSMUSG00000027536	3	10366907	10428856	Chmp4c	charged multivesicular body protein 4C
ENSMUSG00000027534	3	10417817	10440102	Snx16	sorting nexin 16
ENSMUSG00000039717	3	13471655	14182287	Ralyl	RALY RNA binding protein-like
ENSMUSG00000039710	3	14480697	14505830	Slc7a12	solute carrier family 7 (cationic amino acid transporter, y+ system), member 12
ENSMUSG00000027550	3	14533788	14572658	Lrrcc1	leucine rich repeat and coiled-coil domain containing 1
ENSMUSG00000027552	3	14578641	14606309	E2f5	E2F transcription factor 5
ENSMUSG00000078784	3	14606284	14611285	Rbis	ribosomal biogenesis factor
ENSMUSG00000027555	3	14641727	14663002	Car13	carbonic anhydrase 13
ENSMUSG00000027556	3	14766216	14808368	Car1	carbonic anhydrase 1
ENSMUSG00000027559	3	14863512	14872523	Car3	carbonic anhydrase 3
ENSMUSG00000027562	3	14886273	14900770	Car2	carbonic anhydrase 2
ENSMUSG00000095788	3	15371653	15426520	Sirpb1a	signal-regulatory protein beta 1A
ENSMUSG00000095028	3	15495751	15575065	Sirpb1b	signal-regulatory protein beta 1B
ENSMUSG00000074677	3	15795145	15848528	Sirpb1c	signal-regulatory protein beta 1C
ENSMUSG00000047213	3	16183212	16217037	Ythdf3	YTH N6-methyladenosine RNA binding protein 3
ENSMUSG00000040943	3	133463679	133545139	Tet2	tet methylcytosine dioxygenase 2
ENSMUSG00000044365	3	134236484	134262161	Cxxc4	CXXC finger 4
ENSMUSG00000028172	3	134829007	134934579	Tacr3	tachykinin receptor 3
ENSMUSG00000045328	3	135212537	135273611	Cenpe	centromere protein E
ENSMUSG00000028167	3	135281221	135304426	Bdh2	3-hydroxybutyrate dehydrogenase, type 2
ENSMUSG00000037994	3	135307700	135345387	Slc9b2	solute carrier family 9, subfamily B (NHA2, cation proton antiporter 2), member 2
ENSMUSG00000050150	3	135348029	135397827	Slc9b1	solute carrier family 9, subfamily B (NHA1, cation proton antiporter 1), member 1
ENSMUSG00000028165	3	135406412	135423925	Cisd2	CDGSH iron sulfur domain 2
ENSMUSG00000078578	3	135438149	135468198	Ube2d3	ubiquitin-conjugating enzyme E2D 3
ENSMUSG00000028164	3	135485611	135571404	Manba	mannosidase, beta A, lysosomal
ENSMUSG00000028163	3	135584655	135691547	Nfkb1	nuclear factor of kappa light polypeptide gene enhancer in B cells 1, p105
ENSMUSG00000053897	3	135825279	135888572	Slc39a8	solute carrier family 39 (metal ion transporter), member 8
ENSMUSG00000037922	3	136053363	136326066	Bank1	B cell scaffold protein with ankyrin repeats 1
ENSMUSG00000028161	3	136670124	136937727	Ppp3ca	protein phosphatase 3, catalytic subunit, alpha isoform
ENSMUSG00000054690	3	137341067	137432185	Emcn	endomucin
ENSMUSG00000046818	3	137621612	137628333	Ddit4l	DNA-damage-inducible transcript 4-like
ENSMUSG00000037894	3	137864487	137866922	H2az1	H2A.Z variant histone 1
ENSMUSG00000074212	3	137867675	137916557	Dnajb14	DnaJ heat shock protein family (Hsp40) member B14
ENSMUSG00000091512	3	137918506	137928900	Lamtor3	late endosomal/lysosomal adaptor, MAPK and MTOR activator 3
ENSMUSG00000040274	5	3341485	3531008	Cdk6	cyclin-dependent kinase 6
ENSMUSG00000058503	5	3543833	3570238	Fam133b	family with sequence similarity 133, member B
ENSMUSG00000040302	5	3583978	3596585	Rbm48	RNA binding motif protein 48
ENSMUSG00000005907	5	3596066	3637232	Pex1	peroxisomal biogenesis factor 1
ENSMUSG00000007415	5	3632932	3657185	Gatad1	GATA zinc finger domain containing 1
ENSMUSG00000014529	5	3651181	3680325	Tmbim7	transmembrane BAX inhibitor motif containing 7
ENSMUSG00000040351	5	3690000	3802925	Ankib1	ankyrin repeat and IBR domain containing 1
ENSMUSG00000000600	5	3803184	3845564	Krit1	KRIT1, ankyrin repeat containing
ENSMUSG00000040367	5	3845173	3866596	Lrrd1	leucine rich repeats and death domain containing 1
ENSMUSG00000040429	5	3890581	3893933	Mterf1a	mitochondrial transcription termination factor 1a
ENSMUSG00000040407	5	3928054	4081310	Akap9	A kinase (PRKA) anchor protein (yotiao) 9
ENSMUSG00000001467	5	4081145	4104746	Cyp51	cytochrome P450, family 51
ENSMUSG00000053178	5	4192367	4197651	Mterf1b	mitochondrial transcription termination factor 1b
ENSMUSG00000044674	5	4753839	4758035	Fzd1	frizzled class receptor 1
ENSMUSG00000028926	5	4803391	5420312	Cdk14	cyclin-dependent kinase 14
ENSMUSG00000046798	5	5489537	5514958	Cldn12	claudin 12
ENSMUSG00000040464	5	5537454	5559538	Gtpbp10	GTP-binding protein 10 (putative)
ENSMUSG00000040473	5	5579278	5664239	Cfap69	cilia and flagella associated protein 69
ENSMUSG00000015653	5	5664829	5694578	Steap2	six transmembrane epithelial antigen of prostate 2
ENSMUSG00000015652	5	5736317	5749326	Steap1	six transmembrane epithelial antigen of the prostate 1
ENSMUSG00000092094	5	6769010	7344756	Zfp804b	zinc finger protein 804B
ENSMUSG00000040514	5	7304119	7311491	Tex47	testis expressed 47
ENSMUSG00000012428	5	7960457	7982213	Steap4	STEAP family member 4
ENSMUSG00000003161	5	8046078	8069379	Sri	sorcin
ENSMUSG00000040537	5	8072352	8368160	Adam22	a disintegrin and metallopeptidase domain 22
ENSMUSG00000002297	5	8396973	8422716	Dbf4	DBF4 zinc finger
ENSMUSG00000054099	5	8422850	8454797	Slc25a40	solute carrier family 25, member 40
ENSMUSG00000040570	5	8490334	8622952	Rundc3b	RUN domain containing 3B
ENSMUSG00000040584	5	8660077	8748575	Abcb1a	ATP-binding cassette, sub-family B (MDR/TAP), member 1A
ENSMUSG00000028970	5	8798147	8866315	Abcb1b	ATP-binding cassette, sub-family B (MDR/TAP), member 1B
ENSMUSG00000042476	5	8893717	8959231	Abcb4	ATP-binding cassette, sub-family B (MDR/TAP), member 4
ENSMUSG00000003623	5	8966033	8997324	Crot	carnitine O-octanoyltransferase
ENSMUSG00000079659	5	9100668	9160986	Tmem243	transmembrane protein 243, mitochondrial
ENSMUSG00000042508	5	9118801	9161776	Dmtf1	cyclin D binding myb-like transcription factor 1
ENSMUSG00000003974	5	9485541	9725170	Grm3	glutamate receptor, metabotropic 3
ENSMUSG00000095829	5	11341516	11346286	Speer1	spermatogenesis associated glutamate (E)-rich protein 1
ENSMUSG00000040254	5	12383385	12588948	Sema3d	sema domain, immunoglobulin domain (Ig), short basic domain, secreted, (semaphorin) 3D
ENSMUSG00000028883	5	13125414	13602565	Sema3a	sema domain, immunoglobulin domain (Ig), short basic domain, secreted, (semaphorin) 3A
ENSMUSG00000042810	6	48395586	48419781	Krba1	KRAB-A domain containing 1
ENSMUSG00000068551	6	48427697	48445825	Zfp467	zinc finger protein 467
ENSMUSG00000029797	6	48448229	48501250	Sspo	SCO-spondin
ENSMUSG00000039347	6	48537615	48541801	Atp6v0e2	ATPase, H+ transporting, lysosomal V0 subunit E2
ENSMUSG00000073096	6	48554796	48570722	Lrrc61	leucine rich repeat containing 61
ENSMUSG00000009281	6	48569696	48572789	Rarres2	retinoic acid receptor responder (tazarotene induced) 2
ENSMUSG00000052751	6	48593883	48599082	Repin1	replication initiator 1
ENSMUSG00000007216	6	48602063	48623227	Zfp775	zinc finger protein 775
ENSMUSG00000053297	6	48626764	48633689	AI854703	expressed sequence AI854703
ENSMUSG00000064262	6	48647234	48660875	Gimap8	GTPase, IMAP family member 8
ENSMUSG00000051124	6	48676129	48679114	Gimap9	GTPase, IMAP family member 9
ENSMUSG00000054435	6	48684549	48692060	Gimap4	GTPase, IMAP family member 4
ENSMUSG00000047867	6	48701582	48708225	Gimap6	GTPase, IMAP family member 6
ENSMUSG00000043931	6	48718621	48724636	Gimap7	GTPase, IMAP family member 7
ENSMUSG00000090019	6	48739054	48743795	Gimap1	GTPase, IMAP family member 1
ENSMUSG00000043505	6	48746197	48754210	Gimap5	GTPase, IMAP family member 5
ENSMUSG00000039264	6	48764464	48770851	Gimap3	GTPase, IMAP family member 3
ENSMUSG00000029810	6	48833818	48841496	Tmem176b	transmembrane protein 176B
ENSMUSG00000023367	6	48840919	48847071	Tmem176a	transmembrane protein 176A
ENSMUSG00000029811	6	48872896	48909188	Aoc1	amine oxidase, copper-containing 1
ENSMUSG00000029813	6	48929895	48933687	Doxl1	diamine oxidase-like protein 1
ENSMUSG00000068536	6	48974963	48978746	Doxl2	diamine oxidase-like protein 2
ENSMUSG00000039215	6	48986861	48991722	Svs1	seminal vesicle secretory protein 1
ENSMUSG00000029816	6	49036546	49070929	Gpnmb	glycoprotein (transmembrane) nmb
ENSMUSG00000029815	6	49073795	49086751	Malsu1	mitochondrial assembly of ribosomal large subunit 1
ENSMUSG00000029814	6	49085223	49214957	Igf2bp3	insulin-like growth factor 2 mRNA binding protein 3
ENSMUSG00000029817	6	49243924	49264033	Tra2a	transformer 2 alpha
ENSMUSG00000050786	6	49319274	49341582	Ccdc126	coiled-coil domain containing 126
ENSMUSG00000047115	6	49367739	49390539	Fam221a	family with sequence similarity 221, member A
ENSMUSG00000023403	6	49395604	49469501	Stk31	serine threonine kinase 31
ENSMUSG00000029819	6	49822710	49829507	Npy	neuropeptide Y
ENSMUSG00000038388	6	50110241	50198939	Mpp6	membrane protein, palmitoylated 6 (MAGUK p55 subfamily member 6)
ENSMUSG00000029821	6	50188888	50263862	Gsdme	gasdermin E
ENSMUSG00000029822	6	50293330	50456201	Osbpl3	oxysterol binding protein-like 3
ENSMUSG00000063694	6	50562563	50566538	Cycs	cytochrome c, somatic
ENSMUSG00000029831	6	50650672	50654439	Npvf	neuropeptide VF precursor
ENSMUSG00000029832	6	51432670	51458768	Nfe2l3	nuclear factor, erythroid derived 2, like 3
ENSMUSG00000004980	6	51460932	51469894	Hnrnpa2b1	heterogeneous nuclear ribonucleoprotein A2/B1
ENSMUSG00000029836	6	51470360	51483704	Cbx3	chromobox 3
ENSMUSG00000038301	6	51523901	51590679	Snx10	sorting nexin 10
ENSMUSG00000059182	6	51857422	52012549	Skap2	src family associated phosphoprotein 2
ENSMUSG00000029844	6	52155590	52158317	Hoxa1	homeobox A1
ENSMUSG00000014704	6	52162417	52164831	Hoxa2	homeobox A2
ENSMUSG00000079560	6	52169062	52213336	Hoxa3	homeobox A3
ENSMUSG00000000942	6	52189671	52191753	Hoxa4	homeobox A4
ENSMUSG00000038253	6	52201754	52204587	Hoxa5	homeobox A5
ENSMUSG00000043219	6	52206288	52208722	Hoxa6	homeobox A6
ENSMUSG00000038236	6	52214491	52221854	Hoxa7	homeobox A7
ENSMUSG00000038227	6	52223100	52231089	Hoxa9	homeobox A9
ENSMUSG00000000938	6	52231197	52240854	Hoxa10	homeobox A10
ENSMUSG00000038210	6	52242106	52245810	Hoxa11	homeobox A11
ENSMUSG00000038203	6	52257694	52260880	Hoxa13	homeobox A13
ENSMUSG00000005503	6	52313498	52318378	Evx1	even-skipped homeobox 1
ENSMUSG00000029776	6	52546228	52640389	Hibadh	3-hydroxyisobutyrate dehydrogenase
ENSMUSG00000004535	6	52713729	52766780	Tax1bp1	Tax1 (human T cell leukemia virus type I) binding protein 1
ENSMUSG00000063568	6	52768797	53068631	Jazf1	JAZF zinc finger 1
ENSMUSG00000053007	6	53287270	53700376	Creb5	cAMP responsive element binding protein 5
ENSMUSG00000033216	6	88257334	88446539	Eefsec	eukaryotic elongation factor, selenocysteine-tRNA-specific
ENSMUSG00000030079	6	88465409	88497572	Ruvbl1	RuvB-like protein 1
ENSMUSG00000030082	6	88503579	88518905	Sec61a1	Sec61 alpha 1 subunit (S. cerevisiae)
ENSMUSG00000033182	6	88545114	88637950	Kbtbd12	kelch repeat and BTB (POZ) domain containing 12
ENSMUSG00000033174	6	88724412	88828360	Mgll	monoglyceride lipase
ENSMUSG00000030083	6	88835914	88841984	Abtb1	ankyrin repeat and BTB (POZ) domain containing 1
ENSMUSG00000033152	6	88842558	88875044	Podxl2	podocalyxin-like 2
ENSMUSG00000002870	6	88883474	88898780	Mcm2	minichromosome maintenance complex component 2
ENSMUSG00000002871	6	88902251	88912238	Tpra1	transmembrane protein, adipocyte asscociated 1
ENSMUSG00000030084	6	89316314	89362620	Plxna1	plexin A1
ENSMUSG00000030086	6	89383146	89595652	Chchd6	coiled-coil-helix-coiled-coil-helix domain containing 6
ENSMUSG00000000811	6	89643988	89675529	Txnrd3	thioredoxin reductase 3
ENSMUSG00000096051	6	89707540	89716657	Vmn1r40	vomeronasal 1 receptor 40
ENSMUSG00000094586	6	89740766	89747645	Vmn1r41	vomeronasal 1 receptor 41
ENSMUSG00000068232	6	89842573	89876413	Vmn1r42	vomeronasal 1 receptor 42
ENSMUSG00000068231	6	89858934	89876413	Vmn1r43	vomeronasal 1 receptor 43
ENSMUSG00000068234	6	89883660	89894888	Vmn1r44	vomeronasal 1 receptor 44
ENSMUSG00000044248	6	89931649	89940598	Vmn1r45	vomeronasal 1 receptor 45
ENSMUSG00000061653	6	89969313	89986721	Vmn1r46	vomeronasal 1 receptor 46
ENSMUSG00000060724	6	90016147	90027477	Vmn1r47	vomeronasal 1 receptor 47
ENSMUSG00000057592	6	90035933	90036841	Vmn1r48	vomeronasal 1 receptor 48
ENSMUSG00000095932	6	90071893	90078506	Vmn1r49	vomeronasal 1, receptor 49
ENSMUSG00000094553	6	90101430	90109109	Vmn1r50	vomeronasal 1 receptor 50
ENSMUSG00000062818	6	90122596	90132264	Vmn1r51	vomeronasal 1 receptor 51
ENSMUSG00000060816	6	90174808	90181248	Vmn1r52	vomeronasal 1 receptor 52
ENSMUSG00000062546	6	90202786	90205866	V1ra8	vomeronasal 1 receptor, A8
ENSMUSG00000057697	6	90223317	90224438	Vmn1r53	vomeronasal 1 receptor 53
ENSMUSG00000047203	6	90246300	90271213	Vmn1r54	vomeronasal 1 receptor 54
ENSMUSG00000049694	6	90301219	90305449	BC048671	cDNA sequence BC048671
ENSMUSG00000056643	6	90308349	90325185	Chst13	carbohydrate sulfotransferase 13
ENSMUSG00000034456	6	90333284	90364551	Uroc1	urocanase domain containing 1
ENSMUSG00000034430	6	90369492	90403490	Zxdc	ZXD family zinc finger C
ENSMUSG00000048794	6	90403479	90428797	Cfap100	cilia and flagella associated protein 100
ENSMUSG00000030087	6	90462576	90475238	Klf15	Kruppel-like factor 15
ENSMUSG00000030088	6	90486427	90600203	Aldh1l1	aldehyde dehydrogenase 1 family, member L1
ENSMUSG00000030089	6	90604725	90646412	Slc41a3	solute carrier family 41, member 3
ENSMUSG00000034312	6	90656088	90988685	Iqsec1	IQ motif and Sec7 domain 1
ENSMUSG00000030091	6	91013068	91116829	Nup210	nucleoporin 210
ENSMUSG00000034245	6	91156665	91174692	Hdac11	histone deacetylase 11
ENSMUSG00000064080	6	91212455	91272540	Fbln2	fibulin 2
ENSMUSG00000030093	6	91363981	91411363	Wnt7a	wingless-type MMTV integration site family, member 7A
ENSMUSG00000034203	6	91462172	91473546	Chchd4	coiled-coil-helix-coiled-coil-helix domain containing 4
ENSMUSG00000030095	6	91473703	91488463	Tmem43	transmembrane protein 43
ENSMUSG00000030094	6	91489305	91515888	Xpc	xeroderma pigmentosum, complementation group C
ENSMUSG00000034192	6	91515928	91522625	Lsm3	LSM3 homolog, U6 small nuclear RNA and mRNA degradation associated
ENSMUSG00000030096	6	91684053	91759066	Slc6a6	solute carrier family 6 (neurotransmitter transporter, taurine), member 6
ENSMUSG00000030098	6	91761509	91827250	Grip2	glutamate receptor interacting protein 2
ENSMUSG00000034083	6	91878053	91899843	Ccdc174	coiled-coil domain containing 174
ENSMUSG00000034037	6	91978878	92076004	Fgd5	FYVE, RhoGEF and PH domain containing 5
ENSMUSG00000005893	6	92091390	92174294	Nr2c2	nuclear receptor subfamily 2, group C, member 2
ENSMUSG00000014551	6	92169525	92184033	Mrps25	mitochondrial ribosomal protein S25
ENSMUSG00000014550	6	92186712	92214925	Rbsn	rabenosyn, RAB effector
ENSMUSG00000005892	6	92242061	92244650	Trh	thyrotropin releasing hormone
ENSMUSG00000030020	6	92370908	92706155	Prickle2	prickle planar cell polarity protein 2
ENSMUSG00000030022	6	92772699	92943492	Adamts9	a disintegrin-like and metallopeptidase (reprolysin type) with thrombospondin type 1 motif, 9
ENSMUSG00000045095	6	93675455	94283917	Magi1	membrane associated guanylate kinase, WW and PDZ domain containing 1
ENSMUSG00000045100	6	94500331	94604672	Slc25a26	solute carrier family 25 (mitochondrial carrier, phosphate carrier), member 26
ENSMUSG00000030029	6	94604529	94700158	Lrig1	leucine-rich repeats and immunoglobulin-like domains 1
ENSMUSG00000030031	6	95117240	95129790	Kbtbd8	kelch repeat and BTB (POZ) domain containing 8
ENSMUSG00000061838	6	95473009	95718800	Suclg2	succinate-Coenzyme A ligase, GDP-forming, beta subunit
ENSMUSG00000059187	6	96113154	96657198	Tafa1	TAFA chemokine like family member 1
ENSMUSG00000046500	6	96831203	97060413	Tafa4	TAFA chemokine like family member 4
ENSMUSG00000035245	6	97110024	97149182	Eogt	EGF domain-specific O-linked N-acetylglucosamine (GlcNAc) transferase
ENSMUSG00000030059	6	97152997	97179122	Tmf1	TATA element modulatory factor 1
ENSMUSG00000030061	6	97183670	97205647	Uba3	ubiquitin-like modifier activating enzyme 3
ENSMUSG00000035199	6	97210689	97233315	Arl6ip5	ADP-ribosylation factor-like 6 interacting protein 5
ENSMUSG00000044086	6	97238534	97252759	Lmod3	leiomodin 3 (fetal)
ENSMUSG00000030064	6	97286867	97617541	Frmd4b	FERM domain containing 4B
ENSMUSG00000035158	6	97807052	98021349	Mitf	melanogenesis associated transcription factor
ENSMUSG00000030067	6	98925338	99522721	Foxp1	forkhead box P1
ENSMUSG00000093661	6	99625135	99666771	Eif4e3	eukaryotic translation initiation factor 4E member 3
ENSMUSG00000072875	6	99692679	99695066	Gpr27	G protein-coupled receptor 27
ENSMUSG00000030069	6	99711299	99726392	Prok2	prokineticin 2
ENSMUSG00000072872	6	100228565	100287485	Rybp	RING1 and YY1 binding protein
ENSMUSG00000035378	6	100568256	100671157	Shq1	SHQ1 homolog (S. cerevisiae)
ENSMUSG00000030074	6	100704734	100810913	Gxylt2	glucoside xylosyltransferase 2
ENSMUSG00000052144	6	100833622	100869934	Ppp4r2	protein phosphatase 4, regulatory subunit 2
ENSMUSG00000032366	9	67022590	67049406	Tpm1	tropomyosin 1, alpha
ENSMUSG00000052698	9	67217087	67559703	Tln2	talin 2
ENSMUSG00000091956	9	67759437	67760930	C2cd4b	C2 calcium-dependent domain containing 4B
ENSMUSG00000047990	9	67830489	67832330	C2cd4a	C2 calcium-dependent domain containing 4A
ENSMUSG00000035284	9	67840396	67995638	Vps13c	vacuolar protein sorting 13C
ENSMUSG00000032238	9	68653786	69388246	Rora	RAR-related orphan receptor alpha
ENSMUSG00000032235	9	69397906	69433122	Ice2	interactor of little elongation complex ELL subunit 2
ENSMUSG00000032231	9	69453620	69491795	Anxa2	annexin A2
ENSMUSG00000059246	9	69757710	69760940	Foxb1	forkhead box B1
ENSMUSG00000011958	9	69989466	70008317	Bnip2	BCL2/adenovirus E1B interacting protein 2
ENSMUSG00000033543	9	70012550	70022866	Gtf2a2	general transcription factor II A, 2
ENSMUSG00000032226	9	70031496	70038088	Gcnt3	glucosaminyl (N-acetyl) transferase 3, mucin type
ENSMUSG00000032224	9	70088511	70142560	Fam81a	family with sequence similarity 81, member A
ENSMUSG00000032220	9	70207350	70399766	Myo1e	myosin IE
ENSMUSG00000032218	9	70407692	70421547	Ccnb2	cyclin B2
ENSMUSG00000032217	9	70425424	70503725	Rnf111	ring finger 111
ENSMUSG00000032212	9	70542754	70592234	Sltm	SAFB-like, transcription modulator
ENSMUSG00000042444	9	70599014	70657174	Mindy2	MINDY lysine 48 deubiquitinase 2
ENSMUSG00000054693	9	70678997	70780229	Adam10	a disintegrin and metallopeptidase domain 10
ENSMUSG00000032207	9	70798128	70952226	Lipc	lipase, hepatic
ENSMUSG00000032204	9	71110659	71168682	Aqp9	aquaporin 9
ENSMUSG00000013584	9	71215789	71296243	Aldh1a2	aldehyde dehydrogenase family 1, subfamily A2
ENSMUSG00000032199	9	71478437	71485935	Polr2m	polymerase (RNA) II (DNA directed) polypeptide M
ENSMUSG00000041361	9	71504347	71592360	Myzap	myocardial zonula adherens protein
ENSMUSG00000032232	9	71626509	71771602	Cgnl1	cingulin-like 1
ENSMUSG00000032228	9	71842688	72111871	Tcf12	transcription factor 12
ENSMUSG00000038535	9	72274860	72363777	Zfp280d	zinc finger protein 280D
ENSMUSG00000032221	9	72438011	72462025	Mns1	meiosis-specific nuclear structural protein 1
ENSMUSG00000090626	9	72450394	72492212	Tex9	testis expressed gene 9
ENSMUSG00000037674	9	72532240	72622937	Rfx7	regulatory factor X, 7
ENSMUSG00000032216	9	72662346	72749852	Nedd4	neural precursor cell expressed, developmentally down-regulated 4
ENSMUSG00000036030	9	72806874	72917291	Prtg	protogenin
ENSMUSG00000034910	9	72925645	72952181	Pygo1	pygopus 1
ENSMUSG00000092192	9	72958785	72973064	Dnaaf4	dynein axonemal assembly factor 4
ENSMUSG00000086158	9	72979722	72985382	Ccpg1os	cell cycle progression 1, opposite strand
ENSMUSG00000034563	9	72985429	73016340	Ccpg1	cell cycle progression 1
ENSMUSG00000079469	9	73007419	73040378	Pigb	phosphatidylinositol glycan anchor biosynthesis, class B
ENSMUSG00000098332	9	73039718	73042779	Pigbos1	Pigb opposite strand 1
ENSMUSG00000032202	9	73044854	73097629	Rab27a	RAB27A, member RAS oncogene family
ENSMUSG00000092622	9	73101836	73104438	Khdc3	KH domain containing 3, subcortical maternal complex member
ENSMUSG00000032215	9	73113426	73123333	Rsl24d1	ribosomal L24 domain containing 1
ENSMUSG00000062151	9	73479422	73968966	Unc13c	unc-13 homolog C
ENSMUSG00000044976	9	74110356	74283308	Wdr72	WD repeat domain 72
ENSMUSG00000043013	9	74861921	74891781	Onecut1	one cut domain, family member 1
ENSMUSG00000034858	9	74952884	75032468	Fam214a	family with sequence similarity 214, member A
ENSMUSG00000007656	9	75037614	75060313	Arpp19	cAMP-regulated phosphoprotein 19
ENSMUSG00000034593	9	75071015	75223688	Myo5a	myosin VA
ENSMUSG00000033590	9	75232020	75305451	Myo5c	myosin VC
ENSMUSG00000032192	9	75306288	75345876	Gnb5	guanine nucleotide binding protein (G protein), beta 5
ENSMUSG00000032191	9	75347758	75351649	Bcl2l10	Bcl2-like 10
ENSMUSG00000042688	9	75369062	75410005	Mapk6	mitogen-activated protein kinase 6
ENSMUSG00000042487	9	75441524	75466432	Leo1	Leo1, Paf1/RNA polymerase II complex component
ENSMUSG00000058587	9	75497707	75559657	Tmod3	tropomodulin 3
ENSMUSG00000032186	9	75565621	75611325	Tmod2	tropomodulin 2
ENSMUSG00000032184	9	75625741	75637771	Lysmd2	LysM, putative peptidoglycan-binding, domain containing 2
ENSMUSG00000032181	9	75643189	75684056	Scg3	secretogranin III
ENSMUSG00000032572	9	105989454	106096783	Col6a4	collagen, type VI, alpha 4
ENSMUSG00000020258	9	106152857	106158138	Glyctk	glycerate kinase
ENSMUSG00000020257	9	106170928	106191139	Wdr82	WD repeat domain containing 82
ENSMUSG00000020253	9	106194947	106199746	Ppm1m	protein phosphatase 1M
ENSMUSG00000023277	9	106203108	106215389	Twf2	twinfilin actin binding protein 2
ENSMUSG00000045322	9	106222598	106226883	Tlr9	toll-like receptor 9
ENSMUSG00000032786	9	106233455	106248654	Alas1	aminolevulinic acid synthase 1
ENSMUSG00000023345	9	106281061	106350521	Poc1a	POC1 centriolar protein A
ENSMUSG00000053716	9	106368632	106375724	Dusp7	dual specificity phosphatase 7
ENSMUSG00000048758	9	106429454	106431568	Rpl29	ribosomal protein L29
ENSMUSG00000023262	9	106432981	106438319	Acy1	aminoacylase 1
ENSMUSG00000042210	9	106440051	106447678	Abhd14a	abhydrolase domain containing 14A
ENSMUSG00000042073	9	106447459	106452923	Abhd14b	abhydrolase domain containing 14b
ENSMUSG00000023495	9	106453291	106464012	Pcbp4	poly(rC) binding protein 4
ENSMUSG00000091735	9	106463962	106465938	Gpr62	G protein-coupled receptor 62
ENSMUSG00000023249	9	106470322	106476949	Parp3	poly (ADP-ribose) polymerase family, member 3
ENSMUSG00000041506	9	106475963	106485424	Rrp9	RRP9, small subunit (SSU) processome component, homolog (yeast)
ENSMUSG00000066383	9	106499967	106502254	Iqcf1	IQ motif containing F1
ENSMUSG00000118396	9	106503225	106561625	Iqcf2	IQ motif containing F2
ENSMUSG00000066382	9	106514573	106516010	Iqcf5	IQ motif containing F5
ENSMUSG00000041009	9	106568319	106570996	Iqcf4	IQ motif containing F4
ENSMUSG00000091129	9	106625981	106627675	Iqcf6	IQ motif containing F6
ENSMUSG00000023192	9	106643095	106656082	Grm2	glutamate receptor, metabotropic 2
ENSMUSG00000040813	9	106658746	106685927	Tex264	testis expressed gene 264
ENSMUSG00000040661	9	106688082	106789194	Rad54l2	RAD54 like 2 (S. cerevisiae)
ENSMUSG00000040325	9	106821874	106880992	Dcaf1	DDB1 and CUL4 associated factor 1
ENSMUSG00000032575	9	106838312	106891979	Manf	mesencephalic astrocyte-derived neurotrophic factor
ENSMUSG00000074102	9	106880918	106887428	Rbm15b	RNA binding motif protein 15B
ENSMUSG00000039716	9	106892825	107231909	Dock3	dedicator of cyto-kinesis 3
ENSMUSG00000032577	9	107254927	107289877	Mapkapk3	mitogen-activated protein kinase-activated protein kinase 3
ENSMUSG00000032578	9	107296026	107302784	Cish	cytokine inducible SH2-containing protein
ENSMUSG00000032579	9	107327084	107338350	Hemk1	HemK methyltransferase family member 1
ENSMUSG00000010066	9	107399612	107529343	Cacna2d2	calcium channel, voltage-dependent, alpha 2/delta subunit 2
ENSMUSG00000046755	11	91575315	91577558	Kif2b	kinesin family member 2B
ENSMUSG00000056158	11	93098028	93601749	Car10	carbonic anhydrase 10
ENSMUSG00000054079	11	93859243	93885766	Utp18	UTP18 small subunit processome component
ENSMUSG00000059474	11	93885852	93946985	Mbtd1	mbt domain containing 1
ENSMUSG00000020857	11	93949814	93956259	Nme2	NME/NM23 nucleoside diphosphate kinase 2
ENSMUSG00000037601	11	93956979	93968521	Nme1	NME/NM23 nucleoside diphosphate kinase 1
ENSMUSG00000020859	11	93996091	94126085	Spag9	sperm associated antigen 9
ENSMUSG00000037573	11	94211454	94215495	Tob1	transducer of ErbB-2.1
ENSMUSG00000044177	11	94235956	94246005	Wfikkn2	WAP, follistatin/kazal, immunoglobulin, kunitz and netrin domain containing 2
ENSMUSG00000020863	11	94287890	94321988	Luc7l3	LUC7-like 3 (S. cerevisiae)
ENSMUSG00000020864	11	94328001	94341841	Ankrd40	ankyrin repeat domain 40
ENSMUSG00000020865	11	94343295	94392997	Abcc3	ATP-binding cassette, sub-family C (CFTR/MRP), member 3
ENSMUSG00000020866	11	94408391	94474198	Cacna1g	calcium channel, voltage-dependent, T type, alpha 1G subunit
ENSMUSG00000020867	11	94478904	94486179	Spata20	spermatogenesis associated 20
ENSMUSG00000010080	11	94489599	94499974	Epn3	epsin 3
ENSMUSG00000039110	11	94501347	94521742	Mycbpap	MYCBP associated protein
ENSMUSG00000039096	11	94539798	94549255	Rsad1	radical S-adenosyl methionine domain containing 1
ENSMUSG00000076435	11	94557102	94601871	Acsf2	acyl-CoA synthetase family member 2
ENSMUSG00000039084	11	94565047	94569127	Chad	chondroadherin
ENSMUSG00000020869	11	94629767	94645216	Lrrc59	leucine rich repeat containing 59
ENSMUSG00000039055	11	94644996	94653964	Eme1	essential meiotic structure-specific endonuclease 1
ENSMUSG00000024414	11	94653767	94660089	Mrpl27	mitochondrial ribosomal protein L27
ENSMUSG00000020868	11	94663851	94677515	Xylt2	xylosyltransferase II
ENSMUSG00000020870	11	94741782	94743033	Cdc34b	cell division cycle 34B
ENSMUSG00000075610	11	94777217	94782703	Tmem92	transmembrane protein 92
ENSMUSG00000001506	11	94936224	94953042	Col1a1	collagen, type I, alpha 1
ENSMUSG00000001508	11	94962791	94976327	Sgca	sarcoglycan, alpha (dystrophin-associated glycoprotein)
ENSMUSG00000038994	11	94967593	94968456	Hils1	histone H1-like protein in spermatids 1
ENSMUSG00000038976	11	94991035	95006899	Ppp1r9b	protein phosphatase 1, regulatory subunit 9B
ENSMUSG00000047181	11	95009879	95026087	Samd14	sterile alpha motif domain containing 14
ENSMUSG00000038967	11	95026258	95041354	Pdk2	pyruvate dehydrogenase kinase, isoenzyme 2
ENSMUSG00000001507	11	95044474	95076801	Itga3	integrin alpha 3
ENSMUSG00000001510	11	95120119	95125296	Dlx3	distal-less homeobox 3
ENSMUSG00000020871	11	95140447	95146263	Dlx4	distal-less homeobox 4
ENSMUSG00000025278	14	7817957	7951588	Flnb	filamin, beta
ENSMUSG00000025279	14	7964533	7994573	Dnase1l3	deoxyribonuclease 1-like 3
ENSMUSG00000025277	14	8002902	8056763	Abhd6	abhydrolase domain containing 6
ENSMUSG00000023156	14	8080367	8091834	Rpp14	ribonuclease P 14 subunit
ENSMUSG00000033885	14	8098211	8165117	Pxk	PX domain containing serine/threonine kinase
ENSMUSG00000021748	14	8165996	8173025	Pdhb	pyruvate dehydrogenase (lipoamide) beta
ENSMUSG00000021752	14	8214140	8223563	Kctd6	potassium channel tetramerisation domain containing 6
ENSMUSG00000021751	14	8225511	8259353	Acox2	acyl-Coenzyme A oxidase 2, branched chain
ENSMUSG00000021750	14	8296274	8318023	Fam107a	family with sequence similarity 107, member A
ENSMUSG00000021749	14	8348937	8378754	Oit1	oncoprotein induced transcript 1
ENSMUSG00000060579	14	9550092	11162035	Fhit	fragile histidine triad gene
ENSMUSG00000021745	14	11553532	12242041	Ptprg	protein tyrosine phosphatase, receptor type, G
ENSMUSG00000021743	14	12342094	12348189	Fezf2	Fez family zinc finger 2
ENSMUSG00000054423	14	12372563	12823079	Cadps	Ca2+-dependent secretion activator
ENSMUSG00000056296	14	13284780	13616340	Synpr	synaptoporin
ENSMUSG00000044772	14	13670876	13683148	Sntn	sentan, cilia apical structure protein
ENSMUSG00000053453	14	13949012	13961852	Thoc7	THO complex 7
ENSMUSG00000021738	14	13961440	14107302	Atxn7	ataxin 7
ENSMUSG00000021737	14	14112174	14120984	Psmd6	proteasome (prosome, macropain) 26S subunit, non-ATPase, 6
ENSMUSG00000052417	14	14171738	14186838	Olfr720	olfactory receptor 720
ENSMUSG00000072707	14	14322828	14331791	Olfr31	olfactory receptor 31
ENSMUSG00000068758	14	14346275	14356011	Il3ra	interleukin 3 receptor, alpha chain
ENSMUSG00000091809	14	14401298	14410095	Olfr721-ps1	olfactory receptor 721, pseudogene 1
ENSMUSG00000021733	14	14702279	14799940	Slc4a7	solute carrier family 4, sodium bicarbonate cotransporter, member 7
ENSMUSG00000042567	14	14803415	15012059	Nek10	NIMA (never in mitosis gene a)- related kinase 10
ENSMUSG00000045201	14	15357515	15438987	Lrrc3b	leucine rich repeat containing 3B
ENSMUSG00000021786	14	16238652	16249808	Oxsm	3-oxoacyl-ACP synthase, mitochondrial
ENSMUSG00000021785	14	16249280	16311926	Ngly1	N-glycanase 1
ENSMUSG00000017485	14	16365179	16435462	Top2b	topoisomerase (DNA) II beta
ENSMUSG00000017491	14	16430839	16819156	Rarb	retinoic acid receptor, beta
ENSMUSG00000021779	14	17660261	18038090	Thrb	thyroid hormone receptor beta
ENSMUSG00000021775	14	18204054	18239127	Nr1d2	nuclear receptor subfamily 1, group D, member 2
ENSMUSG00000012405	14	18267823	18271391	Rpl15	ribosomal protein L15
ENSMUSG00000021772	14	18271136	18284003	Nkiras1	NFKB inhibitor interacting Ras-like protein 1
ENSMUSG00000021774	14	18282722	18331859	Ube2e1	ubiquitin-conjugating enzyme E2E 1
ENSMUSG00000058317	14	18573575	18894267	Ube2e2	ubiquitin-conjugating enzyme E2E 2
ENSMUSG00000053469	15	66670753	66850721	Tg	thyroglobulin
ENSMUSG00000022372	15	66780819	66831829	Sla	src-like adaptor
ENSMUSG00000005124	15	66891320	66923201	Ccn4	cellular communication network factor 4
ENSMUSG00000005125	15	66929318	66969640	Ndrg1	N-myc downstream regulated gene 1
ENSMUSG00000013846	15	67102875	67176830	St3gal1	ST3 beta-galactoside alpha-2,3-sialyltransferase 1
ENSMUSG00000022335	15	68083764	68258856	Zfat	zinc finger and AT hook domain containing
ENSMUSG00000022332	15	68928420	69101211	Khdrbs3	KH domain containing, RNA binding, signal transduction associated 3
ENSMUSG00000008658	16	5885355	7411526	Rbfox1	RNA binding protein, fox-1 homolog (C. elegans) 1
ENSMUSG00000022715	16	8409275	8425136	Tmem114	transmembrane protein 114
ENSMUSG00000039345	16	8470788	8490684	Mettl22	methyltransferase like 22
ENSMUSG00000057880	16	8513429	8621568	Abat	4-aminobutyrate aminotransferase
ENSMUSG00000043140	16	8633229	8637712	Tmem186	transmembrane protein 186
ENSMUSG00000022711	16	8637674	8662467	Pmm2	phosphomannomutase 2
ENSMUSG00000008393	16	8658580	8672155	Carhsp1	calcium regulated heat stable protein 1
ENSMUSG00000022710	16	8689595	8792308	Usp7	ubiquitin specific peptidase 7
ENSMUSG00000059003	16	9567898	9995560	Grin2a	glutamate receptor, ionotropic, NMDA2A (epsilon 1)
ENSMUSG00000039209	16	10170226	10174911	Rpl39l	ribosomal protein L39-like
ENSMUSG00000039200	16	10192712	10251478	Atf7ip2	activating transcription factor 7 interacting protein 2
ENSMUSG00000022505	16	10281749	10313968	Emp2	epithelial membrane protein 2
ENSMUSG00000039179	16	10357948	10395490	Tekt5	tektin 5
ENSMUSG00000022503	16	10411948	10424428	Nubp1	nucleotide binding protein 1
ENSMUSG00000050908	16	10420557	10447362	Tvp23a	trans-golgi network vesicle protein 23A
ENSMUSG00000022504	16	10480059	10528418	Ciita	class II transactivator
ENSMUSG00000038055	16	10502531	10543054	Dexi	dexamethasone-induced transcript
ENSMUSG00000068663	16	10545339	10744878	Clec16a	C-type lectin domain family 16, member A
ENSMUSG00000038037	16	10782240	10785536	Socs1	suppressor of cytokine signaling 1
ENSMUSG00000043050	16	10787936	10788660	Tnp2	transition protein 2
ENSMUSG00000050058	16	10790505	10790914	Prm3	protamine 3
ENSMUSG00000038015	16	10791380	10796134	Prm2	protamine 2
ENSMUSG00000022501	16	10796326	10805839	Prm1	protamine 1
ENSMUSG00000037991	16	10835059	10892966	Rmi2	RecQ mediated genome instability 2
ENSMUSG00000022500	16	10959275	11066157	Litaf	LPS-induced TN factor
ENSMUSG00000037972	16	11060945	11074985	Snn	stannin
ENSMUSG00000022498	16	11074911	11134650	Txndc11	thioredoxin domain containing 11
ENSMUSG00000037965	16	11136592	11176393	Zc3h7a	zinc finger CCCH type containing 7 A
ENSMUSG00000005846	16	11192970	11203331	Rsl1d1	ribosomal L1 domain containing 1
ENSMUSG00000062203	16	11219292	11254325	Gspt1	G1 to S phase transition 1
ENSMUSG00000022496	16	11313812	11320074	Tnfrsf17	tumor necrosis factor receptor superfamily, member 17
ENSMUSG00000071669	16	11322908	11755472	Snx29	sorting nexin 29
ENSMUSG00000065979	16	11803721	11909445	Cpped1	calcineurin-like phosphoesterase domain containing 1
ENSMUSG00000022494	16	11984113	12270902	Shisa9	shisa family member 9
ENSMUSG00000022545	16	13109684	13150617	Ercc4	excision repair cross-complementing rodent repair deficiency, complementation group 4
ENSMUSG00000009569	16	13256481	13417529	Mrtfb	myocardin related transcription factor B
ENSMUSG00000022685	16	13537960	13668170	Parn	poly(A)-specific ribonuclease (deadenylation nuclease)
ENSMUSG00000022684	16	13671858	13703612	Bfar	bifunctional apoptosis regulator
ENSMUSG00000022683	16	13715057	13730983	Pla2g10	phospholipase A2, group X
ENSMUSG00000022682	16	13780708	13814839	Rrn3	RRN3 RNA polymerase I transcription factor homolog (yeast)
ENSMUSG00000022681	16	13818845	13835451	Ntan1	N-terminal Asn amidase
ENSMUSG00000022680	16	13833148	13903131	Pdxdc1	pyridoxal-dependent decarboxylase domain containing 1
ENSMUSG00000022679	16	13903161	13949619	Mpv17l	Mpv17 transgene, kidney disease mutant-like
ENSMUSG00000065968	16	13981699	13986888	Ifitm7	interferon induced transmembrane protein 7
ENSMUSG00000044117	16	13986604	14101500	Bmerb1	bMERB domain containing 1
ENSMUSG00000060657	16	14109173	14163351	Marf1	meiosis regulator and mRNA stability 1
ENSMUSG00000022678	16	14163275	14192928	Nde1	nudE neurodevelopment protein 1
ENSMUSG00000018830	16	14194535	14291372	Myh11	myosin, heavy polypeptide 11, smooth muscle
ENSMUSG00000022677	16	14299244	14317405	Fopnl	Fgfr1op N-terminal like
ENSMUSG00000023088	16	14361558	14475737	Abcc1	ATP-binding cassette, sub-family C (CFTR/MRP), member 1
ENSMUSG00000022676	16	14705852	14709385	Snai2	snail family zinc finger 2
ENSMUSG00000068617	16	14906606	14981371	Efcab1	EF-hand calcium binding domain 1
ENSMUSG00000022674	16	15552077	15595773	Ube2v2	ubiquitin-conjugating enzyme E2 variant 2
ENSMUSG00000022673	16	15623897	15637400	Mcm4	minichromosome maintenance complex component 4
ENSMUSG00000022672	16	15637866	15842235	Prkdc	protein kinase, DNA activated, catalytic polypeptide
ENSMUSG00000022671	16	15848441	15863369	Mzt2	mitotic spindle organizing protein 2
ENSMUSG00000071637	16	15887286	15891031	Cebpd	CCAAT/enhancer binding protein (C/EBP), delta
ENSMUSG00000041974	16	15889224	16146851	Spidr	scaffolding protein involved in DNA repair
ENSMUSG00000041957	16	16213318	16272712	Pkp2	plakophilin 2
ENSMUSG00000022792	16	16302965	16309640	Yars2	tyrosyl-tRNA synthetase 2 (mitochondrial)
ENSMUSG00000022789	16	16312230	16358959	Dnm1l	dynamin 1-like
ENSMUSG00000022788	16	16416917	16600549	Fgd4	FYVE, RhoGEF and PH domain containing 4
ENSMUSG00000048101	16	16672228	16676405	Olfr19	olfactory receptor 19
ENSMUSG00000022783	16	16753016	16829456	Spag6l	sperm associated antigen 6-like
ENSMUSG00000075370	16	16860671	16863985	Igll1	immunoglobulin lambda-like polypeptide 1
ENSMUSG00000059305	16	16868403	16870843	Vpreb1	pre-B lymphocyte gene 1
ENSMUSG00000022779	16	16870736	16892990	Top3b	topoisomerase (DNA) III beta
ENSMUSG00000026181	16	16896469	16927364	Ppm1f	protein phosphatase 1F (PP2C domain containing)
ENSMUSG00000063358	16	16983382	17047453	Mapk1	mitogen-activated protein kinase 1
ENSMUSG00000022773	16	17069696	17087045	Ypel1	yippee like 1
ENSMUSG00000022771	16	17086555	17111257	Ppil2	peptidylprolyl isomerase (cyclophilin)-like 2
ENSMUSG00000022769	16	17130138	17132383	Sdf2l1	stromal cell-derived factor 2-like 1
ENSMUSG00000022768	16	17139064	17147229	Ccdc116	coiled-coil domain containing 116
ENSMUSG00000041774	16	17144621	17160701	Ydjc	YdjC homolog (bacterial)
ENSMUSG00000038965	16	17152013	17202649	Ube2l3	ubiquitin-conjugating enzyme E2L 3
ENSMUSG00000071636	16	17208603	17213982	Rimbp3	RIMS binding protein 3
ENSMUSG00000050240	16	17233572	17263430	Hic2	hypermethylated in cancer 2
ENSMUSG00000055692	16	17276077	17283229	Tmem191c	transmembrane protein 191C
ENSMUSG00000041720	16	17280351	17406314	Pi4ka	phosphatidylinositol 4-kinase alpha
ENSMUSG00000022766	16	17331371	17343575	Serpind1	serine (or cysteine) peptidase inhibitor, clade D, member 1
ENSMUSG00000022765	16	17405986	17430827	Snap29	synaptosomal-associated protein 29
ENSMUSG00000006134	16	17451987	17487434	Crkl	v-crk avian sarcoma virus CT10 oncogene homolog-like
ENSMUSG00000022763	16	17489611	17507485	Aifm3	apoptosis-inducing factor, mitochondrion-associated 3
ENSMUSG00000022761	16	17508688	17526333	Lztr1	leucine-zipper-like transcriptional regulator, 1
ENSMUSG00000022760	16	17527982	17531136	Thap7	THAP domain containing 7
ENSMUSG00000022759	16	17544465	17561247	Lrrc74b	leucine rich repeat containing 74B
ENSMUSG00000022758	16	17561885	17577800	P2rx6	purinergic receptor P2X, ligand-gated ion channel, 6
ENSMUSG00000022756	16	17572018	17583214	Slc7a4	solute carrier family 7 (cationic amino acid transporter, y+ system), member 4
ENSMUSG00000005899	16	17619354	17644828	Smpd4	sphingomyelin phosphodiesterase 4
ENSMUSG00000041617	16	17646470	17650738	Ccdc74a	coiled-coil domain containing 74A
ENSMUSG00000012114	16	17651208	17732891	Med15	mediator complex subunit 15
ENSMUSG00000022750	16	17759618	17793382	Klhl22	kelch-like 22
ENSMUSG00000012017	16	17797282	17808293	Scarf2	scavenger receptor class F, member 2
ENSMUSG00000090236	16	17835276	17838364	Car15	carbonic anhydrase 15
ENSMUSG00000003166	16	17839482	17898562	Dgcr2	DiGeorge syndrome critical region gene 2
ENSMUSG00000041566	16	17894223	17897922	Tssk1	testis-specific serine kinase 1
ENSMUSG00000045521	16	17898637	17900024	Tssk2	testis-specific serine kinase 2
ENSMUSG00000003527	16	17900709	17911348	Ess2	ess-2 splicing factor
ENSMUSG00000022738	16	17913107	17915059	Gsc2	goosecoid homebox 2
ENSMUSG00000003528	16	17925223	17928219	Slc25a1	solute carrier family 25 (mitochondrial carrier, citrate transporter), member 1
ENSMUSG00000059280	16	17980428	17981273	Vpreb2	pre-B lymphocyte gene 2
ENSMUSG00000003531	16	18052860	18071632	Dgcr6	DiGeorge syndrome critical region gene 6
ENSMUSG00000003526	16	18060357	18090203	Prodh	proline dehydrogenase
ENSMUSG00000043811	16	18127642	18152408	Rtn4r	reticulon 4 receptor
ENSMUSG00000090777	16	18217879	18220348	Ccdc188	coiled-coil domain containing 188
ENSMUSG00000060166	16	18220753	18235136	Zdhhc8	zinc finger, DHHC domain containing 8
ENSMUSG00000005732	16	18239784	18248732	Ranbp1	RAN binding protein 1
ENSMUSG00000022721	16	18248679	18254772	Trmt2a	TRM2 tRNA methyltransferase 2A
ENSMUSG00000022718	16	18253948	18289246	Dgcr8	DGCR8, microprocessor complex subunit
ENSMUSG00000013539	16	18300825	18348103	Tango2	transport and golgi organization 2
ENSMUSG00000000325	16	18348182	18407076	Arvcf	armadillo repeat gene deleted in velocardiofacial syndrome
ENSMUSG00000000326	16	18406886	18426852	Comt	catechol-O-methyltransferase
ENSMUSG00000075704	16	18426384	18479073	Txnrd2	thioredoxin reductase 2
ENSMUSG00000023800	17	3326573	3531344	Tiam2	T cell lymphoma invasion and metastasis 2
ENSMUSG00000036983	17	3519256	3557781	Tfb1m	transcription factor B1, mitochondrial
ENSMUSG00000091530	17	3532554	3533213	Cldn20	claudin 20
ENSMUSG00000023802	17	3635240	3696261	Nox3	NADPH oxidase 3
ENSMUSG00000069729	17	4994332	5347656	Arid1b	AT rich interactive domain 1B (SWI-like)
ENSMUSG00000004945	17	5410870	5440259	Tmem242	transmembrane protein 242
ENSMUSG00000101959	17	5417323	5418767	Ldhal6b	lactate dehydrogenase A-like 6B
ENSMUSG00000034265	17	5492557	5753811	Zdhhc14	zinc finger, DHHC domain containing 14
ENSMUSG00000002365	17	5841329	5931954	Snx9	sorting nexin 9
ENSMUSG00000023805	17	5941280	6044290	Synj2	synaptojanin 2
ENSMUSG00000015659	17	6042196	6079741	Serac1	serine active site containing 1
ENSMUSG00000034345	17	6079786	6086517	Gtf2h5	general transcription factor IIH, polypeptide 5
ENSMUSG00000034377	17	6106437	6251128	Tulp4	tubby like protein 4
ENSMUSG00000038141	17	6256860	6308314	Tmem181a	transmembrane protein 181A
ENSMUSG00000092074	17	6306340	6317500	Dynlt1a	dynein light chain Tctex-type 1A
ENSMUSG00000096255	17	6430112	6436296	Dynlt1b	dynein light chain Tctex-type 1B
ENSMUSG00000000579	17	6601671	6609774	Dynlt1c	dynein light chain Tctex-type 1C
ENSMUSG00000095677	17	6646602	6655900	Dynlt1f	dynein light chain Tctex-type 1F
ENSMUSG00000041831	17	6659093	6738044	Sytl3	synaptotagmin-like 3
ENSMUSG00000052397	17	6738041	6782784	Ezr	ezrin
ENSMUSG00000023806	17	6904413	6948682	Rsph3b	radial spoke 3B homolog (Chlamydomonas)
ENSMUSG00000052031	17	6955011	6961156	Tagap1	T cell activation GTPase activating protein 1
ENSMUSG00000094724	17	6970634	7011299	Rnaset2b	ribonuclease T2B
ENSMUSG00000023809	17	7170115	7303315	Rps6ka2	ribosomal protein S6 kinase, polypeptide 2
ENSMUSG00000071322	17	7324646	7345974	Tcp10a	t-complex protein 10a
ENSMUSG00000079722	17	7350885	7352696	Ttll2	tubulin tyrosine ligase-like family, member 2
ENSMUSG00000056133	17	7362815	7385464	Unc93a2	unc-93 homolog A2
ENSMUSG00000071984	17	7738569	7827302	Fndc1	fibronectin type III domain containing 1
ENSMUSG00000033450	17	7926000	7934897	Tagap	T cell activation Rho GTPase activating protein
ENSMUSG00000073471	17	7945614	7979824	Rsph3a	radial spoke 3A homolog (Chlamydomonas)
ENSMUSG00000095687	17	8115445	8148097	Rnaset2a	ribonuclease T2A
ENSMUSG00000069135	17	8165501	8196804	Fgfr1op	Fgfr1 oncogene partner
ENSMUSG00000040899	17	8236043	8257141	Ccr6	chemokine (C-C motif) receptor 6
ENSMUSG00000023861	17	8282904	8297661	Mpc1	mitochondrial pyruvate carrier 1
ENSMUSG00000073468	17	8311102	8327442	Sft2d1	SFT2 domain containing 1
ENSMUSG00000055945	17	8337459	8344113	Prr18	proline rich 18
ENSMUSG00000058159	17	8355992	8423513	T2	brachyury 2
ENSMUSG00000062327	17	8434423	8442496	T	brachyury, T-box transcription factor T
ENSMUSG00000023868	17	8525372	8986648	Pde10a	phosphodiesterase 10A
ENSMUSG00000046173	17	9666495	9669717	Pabpc6	poly(A) binding protein, cytoplasmic 6
ENSMUSG00000062078	17	10202601	10319854	Qk	quaking
ENSMUSG00000037196	17	10403012	10840311	Pacrg	PARK2 co-regulated
ENSMUSG00000023826	17	10840384	12063361	Prkn	parkin RBR E3 ubiquitin protein ligase
ENSMUSG00000053436	17	28691329	28748406	Mapk14	mitogen-activated protein kinase 14
ENSMUSG00000004864	17	28769297	28780233	Mapk13	mitogen-activated protein kinase 13
ENSMUSG00000063952	17	28801090	28839949	Brpf3	bromodomain and PHD finger containing, 3
ENSMUSG00000043286	17	28858411	28890309	Pnpla1	patatin-like phospholipase domain containing 1
ENSMUSG00000048905	17	28896392	28915324	Bnip5	BCL2 interacting protein 5
ENSMUSG00000045378	17	28933984	28943840	Pxt1	peroxisomal, testis specific 1
ENSMUSG00000024065	17	73804134	73832094	Ehd3	EH-domain containing 3
ENSMUSG00000024066	17	73883895	73950196	Xdh	xanthine dehydrogenase
ENSMUSG00000038541	17	74016955	74047916	Srd5a2	steroid 5 alpha-reductase 2
ENSMUSG00000058704	17	74199036	74295521	Memo1	mediator of cell motility 1
ENSMUSG00000024067	17	74299474	74323944	Dpy30	dpy-30, histone methyltransferase complex regulatory subunit
ENSMUSG00000024068	17	74338987	74391115	Spast	spastin
ENSMUSG00000024069	17	74395608	74424221	Slc30a6	solute carrier family 30 (zinc transporter), member 6
ENSMUSG00000039193	17	74425438	74459142	Nlrc4	NLR family, CARD domain containing 4
ENSMUSG00000024072	17	74489493	74500277	Yipf4	Yip1 domain family, member 4
ENSMUSG00000024073	17	74528295	74703356	Birc6	baculoviral IAP repeat-containing 6
ENSMUSG00000024078	17	74717732	74863570	Ttc27	tetratricopeptide repeat domain 27
ENSMUSG00000024867	19	24294794	24555872	Pip5k1b	phosphatidylinositol-4-phosphate 5-kinase, type 1 beta
ENSMUSG00000074922	19	24476502	24477356	Fam122a	family with sequence similarity 122, member A
ENSMUSG00000048572	19	24674008	24682233	Tmem252	transmembrane protein 252
ENSMUSG00000041731	19	24683016	24861855	Pgm5	phosphoglucomutase 5

## Sheet: MAT_B6N_SNP
ensembl_gene_id	chromosome_name	start_position	end_position	mgi_symbol	mgi_description
ENSMUSG00000028172	3	134829007	134934579	Tacr3	tachykinin receptor 3
ENSMUSG00000045328	3	135212537	135273611	Cenpe	centromere protein E
ENSMUSG00000037994	3	135307700	135345387	Slc9b2	solute carrier family 9, subfamily B (NHA2, cation proton antiporter 2), member 2
ENSMUSG00000037922	3	136053363	136326066	Bank1	B cell scaffold protein with ankyrin repeats 1
ENSMUSG00000040407	5	3928054	4081310	Akap9	A kinase (PRKA) anchor protein (yotiao) 9
ENSMUSG00000012428	5	7960457	7982213	Steap4	STEAP family member 4
ENSMUSG00000002297	5	8396973	8422716	Dbf4	DBF4 zinc finger
ENSMUSG00000068551	6	48427697	48445825	Zfp467	zinc finger protein 467
ENSMUSG00000029797	6	48448229	48501250	Sspo	SCO-spondin
ENSMUSG00000009281	6	48569696	48572789	Rarres2	retinoic acid receptor responder (tazarotene induced) 2
ENSMUSG00000064262	6	48647234	48660875	Gimap8	GTPase, IMAP family member 8
ENSMUSG00000029821	6	50188888	50263862	Gsdme	gasdermin E
ENSMUSG00000000942	6	52189671	52191753	Hoxa4	homeobox A4
ENSMUSG00000034456	6	90333284	90364551	Uroc1	urocanase domain containing 1
ENSMUSG00000030059	6	97152997	97179122	Tmf1	TATA element modulatory factor 1
ENSMUSG00000044086	6	97238534	97252759	Lmod3	leiomodin 3 (fetal)
ENSMUSG00000072872	6	100228565	100287485	Rybp	RING1 and YY1 binding protein
ENSMUSG00000032220	9	70207350	70399766	Myo1e	myosin IE
ENSMUSG00000032232	9	71626509	71771602	Cgnl1	cingulin-like 1
ENSMUSG00000090626	9	72450394	72492212	Tex9	testis expressed gene 9
ENSMUSG00000037674	9	72532240	72622937	Rfx7	regulatory factor X, 7
ENSMUSG00000044976	9	74110356	74283308	Wdr72	WD repeat domain 72
ENSMUSG00000034858	9	74952884	75032468	Fam214a	family with sequence similarity 214, member A
ENSMUSG00000033590	9	75232020	75305451	Myo5c	myosin VC
ENSMUSG00000032572	9	105989454	106096783	Col6a4	collagen, type VI, alpha 4
ENSMUSG00000020258	9	106152857	106158138	Glyctk	glycerate kinase
ENSMUSG00000020253	9	106194947	106199746	Ppm1m	protein phosphatase 1M
ENSMUSG00000045322	9	106222598	106226883	Tlr9	toll-like receptor 9
ENSMUSG00000023249	9	106470322	106476949	Parp3	poly (ADP-ribose) polymerase family, member 3
ENSMUSG00000041009	9	106568319	106570996	Iqcf4	IQ motif containing F4
ENSMUSG00000032579	9	107327084	107338350	Hemk1	HemK methyltransferase family member 1
ENSMUSG00000056158	11	93098028	93601749	Car10	carbonic anhydrase 10
ENSMUSG00000044177	11	94235956	94246005	Wfikkn2	WAP, follistatin/kazal, immunoglobulin, kunitz and netrin domain containing 2
ENSMUSG00000020866	11	94408391	94474198	Cacna1g	calcium channel, voltage-dependent, T type, alpha 1G subunit
ENSMUSG00000010080	11	94489599	94499974	Epn3	epsin 3
ENSMUSG00000020870	11	94741782	94743033	Cdc34b	cell division cycle 34B
ENSMUSG00000025278	14	7817957	7951588	Flnb	filamin, beta
ENSMUSG00000025279	14	7964533	7994573	Dnase1l3	deoxyribonuclease 1-like 3
ENSMUSG00000033885	14	8098211	8165117	Pxk	PX domain containing serine/threonine kinase
ENSMUSG00000021738	14	13961440	14107302	Atxn7	ataxin 7
ENSMUSG00000021786	14	16238652	16249808	Oxsm	3-oxoacyl-ACP synthase, mitochondrial
ENSMUSG00000022503	16	10411948	10424428	Nubp1	nucleotide binding protein 1
ENSMUSG00000050908	16	10420557	10447362	Tvp23a	trans-golgi network vesicle protein 23A
ENSMUSG00000022504	16	10480059	10528418	Ciita	class II transactivator
ENSMUSG00000068663	16	10545339	10744878	Clec16a	C-type lectin domain family 16, member A
ENSMUSG00000037991	16	10835059	10892966	Rmi2	RecQ mediated genome instability 2
ENSMUSG00000022498	16	11074911	11134650	Txndc11	thioredoxin domain containing 11
ENSMUSG00000037965	16	11136592	11176393	Zc3h7a	zinc finger CCCH type containing 7 A
ENSMUSG00000005846	16	11192970	11203331	Rsl1d1	ribosomal L1 domain containing 1
ENSMUSG00000071669	16	11322908	11755472	Snx29	sorting nexin 29
ENSMUSG00000022545	16	13109684	13150617	Ercc4	excision repair cross-complementing rodent repair deficiency, complementation group 4
ENSMUSG00000009569	16	13256481	13417529	Mrtfb	myocardin related transcription factor B
ENSMUSG00000022680	16	13833148	13903131	Pdxdc1	pyridoxal-dependent decarboxylase domain containing 1
ENSMUSG00000023088	16	14361558	14475737	Abcc1	ATP-binding cassette, sub-family C (CFTR/MRP), member 1
ENSMUSG00000022672	16	15637866	15842235	Prkdc	protein kinase, DNA activated, catalytic polypeptide
ENSMUSG00000041974	16	15889224	16146851	Spidr	scaffolding protein involved in DNA repair
ENSMUSG00000022788	16	16416917	16600549	Fgd4	FYVE, RhoGEF and PH domain containing 4
ENSMUSG00000022779	16	16870736	16892990	Top3b	topoisomerase (DNA) III beta
ENSMUSG00000022773	16	17069696	17087045	Ypel1	yippee like 1
ENSMUSG00000041774	16	17144621	17160701	Ydjc	YdjC homolog (bacterial)
ENSMUSG00000071636	16	17208603	17213982	Rimbp3	RIMS binding protein 3
ENSMUSG00000022756	16	17572018	17583214	Slc7a4	solute carrier family 7 (cationic amino acid transporter, y+ system), member 4
ENSMUSG00000012017	16	17797282	17808293	Scarf2	scavenger receptor class F, member 2
ENSMUSG00000003526	16	18060357	18090203	Prodh	proline dehydrogenase
ENSMUSG00000060166	16	18220753	18235136	Zdhhc8	zinc finger, DHHC domain containing 8
ENSMUSG00000022721	16	18248679	18254772	Trmt2a	TRM2 tRNA methyltransferase 2A
ENSMUSG00000000326	16	18406886	18426852	Comt	catechol-O-methyltransferase
ENSMUSG00000023800	17	3326573	3531344	Tiam2	T cell lymphoma invasion and metastasis 2
ENSMUSG00000023805	17	5941280	6044290	Synj2	synaptojanin 2
ENSMUSG00000071984	17	7738569	7827302	Fndc1	fibronectin type III domain containing 1
ENSMUSG00000046173	17	9666495	9669717	Pabpc6	poly(A) binding protein, cytoplasmic 6
ENSMUSG00000043286	17	28858411	28890309	Pnpla1	patatin-like phospholipase domain containing 1
